# Supplementary material for: Bering Sea surface water conditions during Marine Isotope Stages 12 to 10 at Navarin Canyon (IODP Site U1345)
Source: Copernicus journal article supplement (doi:10.5194/cp-2015-184), 2016-01-19
Supplement: Supplementary file [file cp-2015-184-RC2-supplement.pdf]

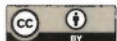

Note:  
WC = word choice  
SP = spelling

1 **Bering Sea surface water conditions during Marine**  
2 **Isotope Stages 12 to 10 at Navarin Canyon (IODP Site**  
3 **U1345)**

4  
5 **Beth E. Caissie<sup>1</sup>, Julie Brigham-Grette<sup>2</sup>, Mea S. Cook<sup>3</sup>, Elena Colmenero-**  
6 **Hidalgo<sup>4</sup>**

7 [1]{Iowa State University, Ames, Iowa}

8 [2]{University of Massachusetts, Amherst, Amherst, Massachusetts}

9 [3]{Williams College, Williamstown, Massachusetts}

10 [4]{Universidad de León, León, Spain}

11 Correspondence to: B.E. Caissie ([bethec@iastate.edu](mailto:bethec@iastate.edu))

12

13 **Abstract**

14 Records of past warm periods are essential for understanding interglacial climate system  
15 dynamics. Marine Isotope Stage 11 occurred ~410 ka when global ice volume was the  
16 lowest, sea level was the highest and terrestrial temperatures were the warmest of the last  
17 500 kyrs. This interval with its extreme character has been considered an analog for the  
18 near future. The Bering Sea is ideally situated to record how opening or closing of  
19 Pacific-Arctic Ocean gateway (Bering Strait) impacted primary productivity, sea ice, and  
20 sediment transport in the past; however, little is known about this region prior to 125 ka.  
21 IODP Expedition 323 to the Bering Sea offered the unparalleled opportunity to look in  
22 detail at time periods older than had been previously retrieved using gravity and piston  
23 cores. Here we present a multi-proxy record for Marine Isotope Stages 12-10 from Site  
24 U1345 located near the shelf-slope break. MIS 11 is bracketed by highly productive  
25 laminated intervals that may have been triggered by flooding of the Beringian shelf. Low  
26 insolation is associated with higher productivity, which was likely driven by increased  
27 upwelling. During the majority of MIS 11 however, high stratification appears to have

Vague (WC)  
Try AD 2100  
and something  
similar

Continental

missing verb?

seasonal?  
or  
annual

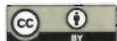

28 led to lowered productivity in both the northern Atlantic and the northern Pacific. U1345,  
29 located near the marginal ice zone, experienced seasonal sea ice throughout both the  
30 glacial and interglacial stages. When global eustatic sea level was at its peak, Beringian  
31 tidewater glaciers advanced, driven by decreasing insolation, reduced seasonality, and  
32 high humidity due to high sea level and ice-free summers. Multiple examples of Pacific-  
33 Atlantic teleconnections are presented including laminations deposited at the end of MIS  
34 11 in sync with millennial scale stadial events seen in the North Atlantic.

35

## 36 1 Introduction

37 Predictions and modeling of future climate change require a detailed understanding of  
38 how the climate system works. Reconstructions of previous warm intervals shed light on  
39 interhemispheric teleconnections. The most recent interglacial period <sup>with</sup> when orbital  
40 conditions ~~were~~ similar to today was approximately 400 ka <sup>5</sup> during the extremely long  
41 interglacial known as marine isotope stage (MIS) 11. Eccentricity was low, obliquity was  
42 high and the amplitude of precessional changes was low (Loutre and Berger, 2003). In  
43 addition, CO<sub>2</sub> concentration averaged approximately 275 ppm, which is similar to pre-  
44 industrial levels (EPICA community members, 2004). The transition from MIS 12 into  
45 MIS 11 has been compared to the last deglaciation (Dickson et al., 2009) and extreme  
46 warmth during MIS 11 has been considered an analog for future warmth (Droxler et al.,  
47 2003; Loutre and Berger, 2003), although the natural course of interglacial warmth today  
48 has been disrupted by anthropogenic forcing (IPCC, 2013).

Consistency

49 Globally, MIS 11 is easily recognizable in the sediment record by an abrupt and distinct  
50 transition from high to low  $\delta^{18}\text{O}$  values at the MIS 12/11 boundary and subsequent  
51 prolonged low values of  $\delta^{18}\text{O}$  during MIS 11 (Lisiecki and Raymo, 2005). Furthermore,  
52 MIS 11 was unique in the polar regions. Antarctica experienced temperatures 2° C  
53 warmer than pre-industrial temperatures (Jouzel et al., 2007), and boreal forest extended  
54 across Greenland, which may have been largely ice free (de Vernal and Hillaire-Marcel,  
55 2008). Large lakes in Siberia were anomalously productive and record warmer air and  
56 lake temperatures than today. Lake Baikal was 2° C warmer (Prokopenko et al., 2010)  
57 and Lake El'gygytyn was 4° C warmer (Lozhkin and Anderson, 2013; Vogel et al.,

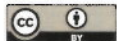

58 2013). MIS 11 is also unique in Beringia because coastal glaciers advanced midway  
59 through the long interglacial cycle while sea level was still high (Brigham-Grette et al.,  
60 2001; Huston et al., 1990; Kaufman et al., 2001; Pushkar et al., 1999). This implies that  
61 parts of Beringia were glaciated rapidly as high latitude insolation fell in the northern  
62 hemisphere, but before global sea level dropped in response to the buildup of large ice  
63 sheets reaching lower latitudes. [MIS 11 ice (i.e., leading to the Nome River Glaciation in  
64 MIS 10) is widely believed to be the last of the most extensive glaciations in central  
65 Beringia (Brigham-Grette et al., 2001; Gualtieri and Brigham-Grette, 2001; Kaufman et  
66 al., 1991; Manley et al., 2001).] *Hmm.*

67 Despite the work done to characterize the warmth of MIS 11 in the terrestrial realm  
68 (Candy et al., 2014; Melles et al., 2012; Prokopenko et al., 2010), as well as the North  
69 Atlantic (Bauch et al., 2000; Chaisson et al., 2002; Dickson et al., 2009; Milker et al.,  
70 2013; Poli et al., 2010), little is known about this interval from the Pacific region (Candy  
71 et al., 2014). Modeling studies describe several mechanisms for linking the Atlantic and  
72 Pacific through oceanic heat transport on glacial-interglacial <sup>time</sup> scales (DeBoer and Nof,  
73 2004; Hu et al., 2010), however, there have been no tests of these modeling studies using  
74 proxy data older than 30 ka. Furthermore, the location of the Bering Sea marginal ice  
75 zone advanced and retreated hundreds of kilometers during the past three glacial-  
76 interglacial cycles (Caissie et al., 2010; Katsuki and Takahashi, 2005; Sancetta and  
77 Robinson, 1983); however, sea surface and intermediate water variability before MIS 5 is  
78 unknown.

79 This investigation of terrestrial-marine coupling at the shelf-slope break from MIS 12 to  
80 10 is the first study of this interval in the subarctic Pacific (Fig. 1). We use  
81 sedimentology, diatom assemblages, geochemistry, and calcareous nannofossil  
82 abundances as proxies for sea ice, sea surface conditions, and shelf to basin transport.  
83 These proxy records show changes in sea ice and glacial ice that are in sync with  
84 insolation changes at high northern latitudes. An interval of productivity occurs at the  
85 glacial termination (Termination V) that is both short-lived and intense. This is followed  
86 by evidence of glacial advance in Beringia during peak MIS 11 when sea level is high.  
87 We put these changes seen in the Bering Sea in the context of global records of MIS 11.

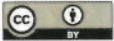

88

## 89 2 Background

### 90 2.1 Global Sea Level during MIS 11

91 The maximum height of sea level during MIS 11 is an open question with estimates  
92 ranging from more than 20 m above present sea level (apsl) (Kindler and Hearty, 2000) to  
93 0 m apsl (Rohling et al., 2010). The discrepancy may stem from large differences  
94 between global eustatic (Bowen, 2010) or ice-volume averages (McManus et al., 2003)  
95 and regional geomorphological or micropaleontological evidence (van Hengstum et al.,  
96 2009). Regional isostatic adjustment due to glacial loading and unloading is also perhaps  
97 not as insignificant as previously assumed and regional highstands may record higher  
98 than expected sea levels if glacial isostasy and dynamic topography have not been  
99 accounted for, even in places that were never glaciated (Raymo and Mitrovica, 2012;  
100 Raymo et al., 2011). Work by Raymo and Mitrovica suggests that eustatic sea level  
101 during MIS 11 was 6-13 m apsl globally and near 5 m apsl locally in Beringia (Raymo  
102 and Mitrovica, 2012).

103 Regardless of the ultimate height of sea level, the transition from MIS 12 to MIS 11 was  
104 the greatest change in sea level of the last 500 ka (Rohling et al., 1998); sea level rose  
105 from -140 m to its present level or higher (Bowen, 2010). Up to three highstands  
106 occurred during MIS 11 (Kindler and Hearty, 2000), the highest at the second June  
107 insolation peak at 65°N. This highstand is referred to as MIS 11.3 and occurs 406 ka  
108 (Bassinot et al., 1994). Sea levels above modern require partial or complete collapse of  
109 the Greenland ice sheet (up to 6 m) (de Vernal and Hillaire-Marcel, 2008) and/or the  
110 West Antarctic Ice Sheet (Scherer et al., 1998), but not the East Antarctic Ice Sheet  
111 (Berger et al., 2015; Raymo and Mitrovica, 2012). It has frequently been hypothesized  
112 that the West Antarctic Ice Sheet collapsed during MIS 11 and modeling studies confirm  
113 this (Pollard and DeConto, 2009), [however drilling in Antarctica was not able to confirm  
114 a collapse (Naish et al., 2009)] East Antarctica appears stable; however, small changes in  
115 either Antarctic ice sheet may have contributed up to 5 m of sea level rise (Berger et al.,  
116 2015; EPICA community members, 2004).

117

sector  
of  
the

awkward  
phrase

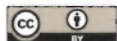

## 118 2.2 Sea Level Variation in Beringia

119 Beringia refers to both the terrestrial and marine regions north of the Aleutian Islands that  
120 stretch to the shelf-slope break in the East Siberian, Chukchi, and Beaufort seas (Fig. 1).  
121 On land, Beringia extends from the Lena River in Siberia to the Mackenzie River in  
122 Canada. Large portions of the Beringian shelf are exposed when sea level drops below -  
123 50 m (Hopkins, 1959) and this subaerial expanse stretches more than 1000 km from north  
124 to south during glacial periods (Fig. 2). In contrast, as sea level rises at glacial  
125 terminations the expansive continental shelf is flooded, introducing fresh organic matter  
126 and nutrients into the southern Bering Sea (i.e. Bertrand et al., 2000; Ternois et al., 2001)  
127 and re-establishing the connection between the Pacific and Atlantic oceans through  
128 Bering Strait.

129

## 130 2.3 Beringian Hydrography

*→ worth adding Fig. 1 aerology?*

131 Today, water circulates cyclonically in the deep basins of the Bering Sea (Fig. 1). Site  
132 U1345 is influenced by the northwest flowing Bering Slope Current, which is derived  
133 from the Alaskan Stream. South of the Aleutians Islands, the Alaskan Stream flows  
134 westward and enters the Bering Sea through deep channels in the western Aleutian  
135 Islands. Once north of the Aleutian Islands, this water mass <sup>becomes</sup> ~~is called~~ the Aleutian North  
136 Slope Current, and flows eastward until it reaches the Bering Sea shelf. Interactions with  
137 the shelf turn this current to the northwest where it becomes the Bering Slope Current  
138 (Stabeno et al., 1999). Tidal forces and eddies in the Bering Slope Current drive  
139 upwelling through Navarin Canyon and other interfluves along the shelf-slope break  
140 (Kowalik, 1999). The resulting cold water and nutrients brought to the sea surface,  
141 coupled with the presence of seasonal sea ice, drive the high productivity found today in  
142 the so called “Green Belt” (Springer et al., 1996) along the shelf-slope break. North of the  
143 site, low salinity, high nutrient shelf waters (Cooper et al., 1997) primarily flow north  
144 through the Bering Strait to the Arctic Basin (Schumacher and Stabeno, 1998).

145 Major changes in circulation may have occurred throughout MIS 12 to 10 due to sea level  
146 rise and fall, the strength of North Atlantic Deep Water (NADW) formation, and the  
147 intensity of winds originating in the Southern Ocean (e.g. DeBoer and Nof, 2004; Hu et

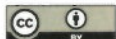

148 al., 2010). Specifically, as sea level rose after MIS 12, the connection between the Pacific  
149 and the Atlantic was reestablished. De Boer and Nof (2004) suggest that under high sea  
150 level conditions, if freshwater is suddenly released into the North Atlantic, the Bering  
151 Strait might act as an “exhaust valve” allowing fresh water from the North Atlantic to  
152 flow into the Arctic Ocean and then flow south through the Bering Strait, thus preventing  
153 a shut-down in thermohaline circulation (DeBoer and Nof, 2004). Hu et al. (2010)  
154 suggest that when sea level is fluctuating near the sill depth of Bering Strait (~ -50 m aspl  
155 today), this gateway can modulate widespread climate changes. When Bering Strait is  
156 open and North Pacific water is transported to the North Atlantic, the less saline Pacific  
157 water can freshen the North Atlantic and slow meridional overturning, subsequently  
158 cooling the North Atlantic, but warming the North Pacific. This North Atlantic cooling  
159 can result in the buildup of ice sheets and global sea level drops, closing Bering Strait. A  
160 closed Bering Strait concentrates fresher waters in the North Pacific and more saline  
161 waters in the North Atlantic. A more saline Atlantic means that stratification is low and  
162 meridional overturning is increased. This increases oceanic heat transport to the North  
163 Atlantic, triggers warming in the North Atlantic and ultimately ice sheets retreat and sea  
164 level rises reconnecting the Pacific with the Atlantic (Hu et al., 2010).

Good  
summary,  
but reads  
to be  
more  
concise.

165

### 166 3 Methods

#### 167 3.1 Study Area and Sampling

168 The Integrated Ocean Drilling Program’s (IODP) Expedition 323, Site U1345, is located  
169 on an interfluvial ridge near the shelf-slope break in the Bering Sea (Fig. 1). Navarin  
170 Canyon, one of the largest submarine canyons in the world (Normack and Carlson, 2003)  
171 is located just to the northwest of the site. Sediments were retrieved from ~1008 m of  
172 water, placing the site within the center of the modern day oxygen minimum zone  
173 (Takahashi et al., 2011). We focus on this site because of its proximity to the modern  
174 marginal ice zone in the Bering Sea and observed high sedimentation rates.

175 Site U1345 was drilled five times during Exp. 323 and cores from four of these holes  
176 were described onboard the JOIDES Resolution. This study focuses on a splice of 3 holes  
177 that were correlated onboard the ship, so that core gaps in one hole are covered by core

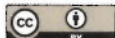

178 material in other holes. In addition to the original analyses presented here, we refer to the  
179 shipboard core descriptions and physical properties data (Takahashi et al., 2011) in our  
180 interpretations. Depths are reported in CCSF-A, a correlated depth scale that allows for  
181 direct comparison between drill holes. Units are meters below sea floor (mbsf). A small  
182 syringe was used to collect approximately 1 cc of sediment periodically between 112.96  
183 m and 136.40 mbsf. Sampling resolution varied for each analysis. Hyalochaete  
184 *Chaetoceros* resting spores were counted on average every 20 cm (~600 yr resolution),  
185 full diatom counts were carried out every 36 cm (~1000 yr resolution), calcareous  
186 nannofossils were counted every 40 cm (~1200 yr resolution), grain size was analyzed  
187 every 23 cm (670 yr resolution), and geochemistry was analyzed every 30 cm (800 yr  
188 resolution).

189

### 190 3.2 Age Model

191 The age model (Fig. 3) is derived from the shipboard age model, which was developed  
192 using magnetostratigraphy and biostratigraphy. First and last appearance datums for  
193 diatoms and radiolarians make up the majority of the biostratigraphic markers used to  
194 place the record in the correct general stratigraphic position (Takahashi et al., 2011).  
195 Oxygen isotope measurements taken on the benthic foraminifera, *Uvigerina peregrina*,  
196 *Nonionella labradorica*, and *Globobulimina affinis* (Cook et al., In Press) were then used  
197 to tune site U1345 to the global marine benthic foraminiferal isotope stack (LR04)  
198 (Lisiecki and Raymo, 2005) (Fig. 3). Based on this combined age model, MIS 11 spans  
199 from 115.3 to 130.6 mbsf (Cook et al., In Press); however, the characteristic interglacial  
200 isotopic depletion was not found in U1345 which means that the exact timing of peak  
201 interglacial conditions is unknown.

202 The nearby core, IODP Exp 323, Site U1343 (Fig. 1) has an excellent oxygen isotopic  
203 record during MIS 11 (Kim et al., 2014). We compared the two isotopic records and their  
204 magnetic susceptibilities (Fig. 3) and found that even with only two tie points, there was  
205 good correlation between the timing of the onset of laminated intervals and also the  
206 interglacial increase in magnetic susceptibility (Fig. 3). We added one additional tie point  
207 to connect the inflection points in magnetic susceptibility. In U1343, this point occurred

MS correlations look good; maybe some compression/expansion visible?  
5180 looks okay, but error is acknowledged  
~~is not; needs more data~~

this is odd.....

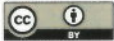

208 at 398.50 ka. U1345 was shifted 1.5 ka younger in order to align with U1343. The  
209 addition of this point allows us to have more confidence in the timing of peak interglacial  
210 conditions in U1345. However, given the oxygen isotope sampling resolution, as well as  
211 the stated error in the LR04 dataset (4 kyr), we estimate the error of the age model could  
212 be up to 5 kyr. [Therefore, we urge caution when interpreting millennial scale changes at  
213 the site or comparing our record to others that examine MIS 11 at millennial scale  
214 resolution or finer.]

*[ Good acknowledgement of error!*

215 Sedimentation rates during the study interval range from 29 cm/kyrs to 45 cm/kyr with  
216 the highest sedimentation rates occurring during glacial periods.

217

### 218 3.3 Diatom Analysis

219 In order to quantify the number of diatom valves deposited per gram of sediment, diatom  
220 slides were prepared according to the method described in Scherer (1994). This method  
221 allows for a direct comparison of diatom accumulation in the sediments between samples,

222 [though not diatom flux] Cover slips were mounted on cleaned microscope slides using  
223 hyrax in toluene (refractive index: 1.7135). At least 300 diatom valves were identified in  
224 at least three random transects across the slide using a light microscope at magnifications  
225 from 1000x to 1250x (see Armand et al., 2005; Sancetta, 1979; Sancetta and Silvestri,  
226 1986; Scherer, 1994). The portion of the slide that was examined was measured using a  
227 stage micrometer. Partial valves were counted according to the methods of Schrader and  
228 Gersonde (1978). All diatoms were identified to the species level when possible  
229 following published taxonomic descriptions and images (Hasle and Heimdal, 1968;  
230 Koizumi, 1973; Lundholm and Hasle, 2008, 2010; Medlin and Hasle, 1990; Medlin and  
231 Priddle, 1990; Onodera and Takahashi, 2007; Sancetta, 1982, 1987; Syvertsen, 1979;  
232 Tomas, 1996; Witkowski et al., 2000). Diatom counts were transformed into relative  
233 percent abundances. Absolute abundances (diatoms per gram sediment) were calculated  
234 following the methods of Scherer (1994). Diatom taxa were then grouped according to  
235 ecological niche (Table 1) based on biological observations (Aizawa et al., 2005; Fryxell  
236 and Hasle, 1972; Håkansson, 2002; Horner, 1985; Saito and Taniguchi, 1978;  
237 Schandelmeier and Alexander, 1981; von Quillfeldt, 2001; von Quillfeldt et al., 2003)

*Huh?  
You mean  
flux rate  
right?*



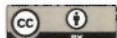

238 and statistical associations (Barron et al., 2009; Caissie et al., 2010; Hay et al., 2007;  
239 Katsuki and Takahashi, 2005; Lopes et al., 2006; McQuoid and Hobson, 2001; Sancetta,  
240 1982, 1981; Sancetta and Robinson, 1983; Sancetta and Silvestri, 1986; Shiga and  
241 Koizumi, 2000). In cases where a diatom species was reported to fit into more than one  
242 environmental niche, it was grouped into the niche where it was most commonly  
243 recognized in the literature.

244

### 245 **3.4 Calcareous Nannofossils**

246 In order to quantify calcareous nannofossils per gram of sediment, a total of 18 samples  
247 were prepared following the methodology of Flores and Sierro (1997). A known mass of  
248 dried sediment was diluted in a known volume of buffered water. A small fraction was  
249 extracted with a micropipette and dropped onto a petri dish previously filled with  
250 buffered water and with a cover slip in its bottom. After settling overnight, the excess  
251 water was removed and the slide was left to dry and then mounted using Canada balsam.

252 Observations were made using a Zeiss polarized light microscope at 1000x  
253 magnification. Samples were considered barren if no coccoliths were found in at least  
254 165 randomly selected fields of view. All taxa were identified to the species or variety  
255 level, following Flores et al. (1999) and Young et al. (2003).

256

### 257 **3.5 Grain Size**

258 Volume percent of grains in 109 size bins ranging from 0.01  $\mu\text{m}$  to 3500  $\mu\text{m}$  was  
259 measured using a Malvern Mastersizer 3000 with the Hydro MV automated wet  
260 dispersion unit. Samples were prepared by adding 200  $\mu\text{l}$  of the deflocculant, sodium  
261 hexametaphosphate, to 0.2 mg dry sediment. In this way, we were able to quantify all  
262 sediment types including biogenic and terrigenous grains.

263

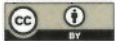

264 **3.6 Geochemistry**

265 Sediment samples were freeze-dried then ground. An aliquot of homogenized sediment  
266 was treated to remove carbonates using pH 5 buffered acetic acid. The carbon (from the  
267 acidified sediment) and nitrogen (from the unacidified sediment) isotopic and elemental  
268 composition of organic matter was determined by Dumas combustion using a Carlo Erba  
269 1108 elemental analyzer coupled to a Thermo-Finnigan Delta Plus XP isotope ratio mass  
270 spectrometer at the University of California Santa Cruz Stable Isotope Laboratory. The 1-  
271 sigma precision of stable isotope measurements and elemental composition of carbon are  
272 0.2‰ and 0.03‰, respectively, and for nitrogen are 0.2‰ and 0.002‰, respectively.  
273 Percent CaCO<sub>3</sub> was calculated according to Schubert and Calvert (2001).

274  
275 **4 Results**

276 **4.1 Sedimentology**

277 In general the sediments at Site U1345 are massive with centimeter-scale dark or coarse-  
278 grained mottles. The sediments are mainly composed of clay and silt with varying  
279 amounts of diatoms, sand, and tephra throughout. Laminated intervals bracket MIS 11  
280 (Fig. 4). The proportion of diatoms relative to terrigenous or volcanogenic grains is  
281 highest during laminated intervals and lowest immediately preceding Termination V  
282 (~425 ka). Vesiculated tephra shards were seen in every diatom slide analyzed. Several  
283 thin (< 1 cm) sand layers and shell fragments were visible on the split cores, especially  
284 during MIS 12. However, high-resolution grain size analyses show that the median grain  
285 size was lowest during MIS 12, increasing from approximately 14 μm to 21 μm at the  
286 start of Termination V at 424.5 ka (130.92 mbsf). [Median grain size peaks at 84 μm  
287 between 401 and 407 ka (125.42-123.62 mbsf). This interval is also the location of an  
288 obvious sandy layer in the core.] After this interval, median grain size remains steady at  
289 about 17 μm. Subrounded to rounded clasts (granule to pebble) commonly occur on the  
290 split surface of the cores. We combined clast and sand layer data from all Holes at Site  
291 U1345 when examining their distribution (Fig. 4).

*Isotope standards?  
(Please include "standard" isotope details,  
e.g., referenced to which int. standards,  
‰ notation, etc.)*

*Is this a turbidite?  
If so, then "continuous" diagnosis problematic  
→ low diatom abundance  
→ low δ<sup>15</sup>N  
→ high P.  
→ sulcata?*

*Transported*

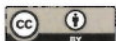

292 A 3.5 m thick laminated interval, estimated to span 12 kyrs (see Table 2 for depths and  
293 ages) is deposited beginning during Termination V. Although the termination is short  
294 lived and the laminated interval quite long, we refer to it as the Termination V  
295 Laminations for the sake of clarity throughout this manuscript. The next laminated  
296 interval occurs at about 394 ka and lasts approximately 1100 years. During the transition  
297 from late MIS 11 to MIS 10, a series of four thin laminated intervals are observed. Each  
298 interval lasts between 0.34 and 1.25 ka (Table 2). In general, the upper and lower  
299 boundaries of laminated intervals are gradational; however the boundaries between  
300 individual lamina are sharp (Takahashi et al., 2011). There are two types of laminations.  
301 The Termination V Laminations are Type I laminations: millimeter-scale alternations of  
302 black, olive gray, and light brown triplets. In addition to containing a high proportion of  
303 diatoms, this laminated interval also contains high relative proportions of calcareous  
304 nannofossils and foraminifera (Takahashi et al., 2011). The majority of laminations are  
305 parallel; however, a 7 cm interval during the Termination V Laminations is highly  
306 disturbed in Hole A, showing recumbent folds in the laminations (Takahashi et al., 2011).  
307 This interval was not sampled. Type II laminations occur throughout the remainder of  
308 MIS 11. These laminations have fewer diatoms and tend to be couplets of siliciclastic  
309 sediments with <40% diatoms (Takahashi et al., 2011). Percent CaCO<sub>3</sub> also increases  
310 during these laminations though foraminifera and calcareous nannofossils are very rarely  
311 seen. None of these later laminated intervals contain any evidence of disturbance.

Is this  
right  
unit?

type  
of

312

## 313 4.2 Diatoms

### 314 4.2.1 Diatom Assemblages

I like the diversity indices!

315 A total of 97 different diatom taxa were identified. Individual samples include between  
316 26 and 46 taxa each with an average of 37 taxa. Both types of laminated intervals contain  
317 fewer taxa than bioturbated intervals do. This decrease in diversity is confirmed using the  
318 Margalef, Simpson, and Shannon indices which all show similar down-core profiles (Fig.  
319 5). The Margalef index is a measure of species richness (Maurer and McGill, 2011). It  
320 shows a decrease in the number of taxa during four out of five laminated intervals that are  
321 sufficiently well sampled. Between laminated intervals, there is a noted decrease in taxa

⊕ probably  
only need  
to cite one  
in subsection  
since all tests  
are derived  
from this text.

Species  
richness  
indices  
belong  
end of  
4.2.1

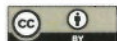

322 at 388 ka. Instead of species richness, the Simpson index measures the evenness of the  
323 sample. Values close to 1 indicate that all taxa contain an equal number of individuals,  
324 while values close to 0 indicate that one species dominates the assemblage (Maurer and  
325 McGill, 2011). In general, the Simpson index is close to 1 throughout the core indicating  
326 a rather even distribution of diatom valves across all taxa; however, during the  
327 Termination V Laminations and the most recent two laminations, the Simpson index  
328 drops reflecting the dominance by *Chaetoceros* RS during these intervals (Fig. 5). [It does  
329 not come close to 0, which would likely indicate a strong dissolution signal.] The Shannon  
330 diversity index measures both species richness and evenness (Maurer and McGill, 2011).  
331 Correspondingly, it is low during three of the laminated intervals, high during MIS 12  
332 and peaks at 397 ka (Fig. 5).

needs  
transition +  
awkward  
sounding

333 Absolute diatom abundances vary between  $10^6$  and  $10^8$  diatoms deposited per gram of  
334 sediment with values an order of magnitude higher during most laminated intervals than  
335 during massive intervals (Fig. 5). The diatom assemblage is dominated by *Chaetoceros*  
336 and *Thalassiosira antarctica* resting spores (RS), with lesser contributions from  
337 *Fragilariopsis oceanica*, *Fragilariopsis cylindrus*, *Fossula arctica*, [*Shionodiscus trifultus*  
338 (= *Thalassiosira trifulta*), *Thalassiosira binata*, small (<10  $\mu\text{m}$  in diameter) *Thalassiosira*  
339 species, *Paralia sulcata*, *Lindavia* cf. *ocellata*, *Neodenticula seminae*, and *Thalassionema*  
340 *nitzschioides*] (Fig. 6).

Fig. 6  
has label  
as "T. trifulta"

341 Relative percent abundances of *Chaetoceros* RS are highest (up to 69%) during the  
342 Termination V Laminations and, <sup>follow</sup> in general, mimic the pattern of both diatom  
343 accumulation rate and insolation at 65° N (Berger and Loutre, 1991). When insolation is  
344 low, *Chaetoceros* RS are also low (Fig. 7). *T. antarctica* RS, in contrast, are lowest  
345 during the Termination V Laminations (as low at 1%) and higher during MIS 12 and after  
346 406 ka (above 125.00 mbsf and 112.97 mbsf). This taxon peaks at 38% relative  
347 abundance at 390 ka (120.45 mbsf; Fig. 6).

348 Relative percent abundances of the characteristic marginal ice zone species, *F. oceanica*  
349 and *F. cylindrus* (Caissie et al., 2010; Saito and Taniguchi, 1978; Sancetta, 1982; von  
350 Quillfeldt et al., 2003), oscillate between ~10% and less than 3% of the diatom  
351 assemblage and are highest during MIS 12 and all laminated intervals. They are both at

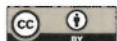

352 their lowest between ~411 to ~400 ka (126.62 to 123.45 mbsf). The neritic species and  
353 moving water indicator, *P. sulcata* is lowest during the laminated intervals. It reaches a  
354 maximum (34% relative abundance) at 404 ka (124.61 mbsf). *P. sulcata* remains  
355 moderately high (~10%) during non-laminated intervals. *L. cf. ocellata* is the dominant  
356 taxa in the fresh water group and the variability in its abundances is discussed below. *S.*  
357 *trifultus* follows a very similar distribution to the fresh water group and *L. cf. ocellata*. It  
358 is relatively high (~4%) during MIS 12, is virtually absent from the sediments during the  
359 Termination V Laminations, and then increases again until it peaks at 10% relative  
360 abundance at 400 ka (123.22 mbsf). *Thalassiosira binata* and other small (<10 µm in  
361 diameter) *Thalassiosira* species have similar distributions with low relative abundances  
362 throughout the record (< 6%) except for a small peak between 397 and 386 ka (122.62  
363 and 119.07 mbsf). The relative percent abundances of *N. seminae* are discussed below.  
364 The largest peak in *N. seminae* is at 392 ka (121.2 mbsf) (Fig. 6).

365

#### 366 4.2.2 Diatom Proxies

367 Diatoms, like many organisms, thrive under a specific range of environmental conditions  
368 or optima and these optima are different for each species. For this reason, diatom  
369 assemblages are excellent paleoceanographic indicators (Smol, 2002). Table 1 delineates  
370 which species were grouped together into specific environmental niches. Our  
371 interpretations of the paleoceanographic sea surface conditions at the Bering Sea shelf-  
372 slope break during MIS 12 to 10 are based on changes in these 8 groups and the  
373 variability of *Neodenticula seminae*, an indicator of the Alaskan Stream and North  
374 Pacific water (Katsuki and Takahashi, 2005; Sancetta, 1982) (Fig. 7).

375

##### 376 4.2.2.1 Sea Ice Species

377 Epontic diatoms are those that bloom attached to the underside of sea ice or within brine  
378 channels in the ice. This initial bloom occurs below the ice as soon as enough light  
379 penetrates to initiate photosynthesis in the Bering Sea, which can occur as early as March  
380 (Alexander and Chapman, 1981). The centric diatom, *Melosira arctica*, and pennate

Huh?  
Down slope  
transport?

Not  
on Fig. 6

On Fig. 6,  
listed as  
*Cyclosetella*

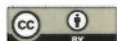

381 diatoms, *Nitzschia frigida* and *Navicula transitrans* are among the major components of  
382 the eponitic diatom bloom (von Quillfeldt et al., 2003) and all are found in the sediments  
383 at U1345A, although they tend to be quite rare.

384 A second ice-associated bloom occurs as sea ice begins to break up on the Bering Sea  
385 shelf. This bloom is referred to as the marginal ice zone bloom and many of its members  
386 are common species in the sediment assemblage including the pennate diatom,  
387 *Staurosirella* cf. *pinnata* (= *Fragilaria* cf. *pinnata*), and the centric diatoms, *Bacterosira*  
388 *bathyomphala* and several *Thalassiosira* species including *Thalassiosira antarctica*  
389 (Schandelmeier and Alexander, 1981; Shiga and Koizumi, 2000; von Quillfeldt et al.,  
390 2003). *T. antarctica* resting spores have been classified in various ways in the past and  
391 their ecology is not well understood. However, *T. antarctica* is a member of the marginal  
392 ice zone flora (von Quillfeldt et al., 2003) and was the only organism found in thick pack  
393 ice (Horner, 1985). The resting spores are associated with coastal or ice-margin waters  
394 that range from  $-1$  to  $4^{\circ}$  C and have relatively low salinity (25–34‰) (Barron et al.,  
395 2009; Shiga and Koizumi, 2000). In Antarctica, *T. antarctica* blooms in concert with  
396 frazil and platelet ice growth in the fall (Pike et al., 2009). This same association has not  
397 yet been observed in the Arctic, though it is a possibility. High abundances might indicate  
398 that ice formed early enough in the fall that light and/or nutrients were high enough to  
399 support *T. antarctica* growth then.

400 Several diatom species are present in both types of sea ice blooms, and so while they are  
401 indicators of ice presence, they cannot be used to distinguish between types of sea ice.  
402 These species are grouped under “both ice types” and include such common diatoms as  
403 *Fragilariopsis oceanica*, *Fragilariopsis cylindrus*, *Fossula arctica*, and many Naviculoid  
404 pennate diatoms (Saito and Taniguchi, 1978; Sancetta, 1981; Schandelmeier and  
405 Alexander, 1981; von Quillfeldt, 2001; von Quillfeldt et al., 2003).

406 Eponitic species are present in low relative percent abundances ( $< 5\%$ ) throughout much  
407 of the record, but there is a marked absence of them during the laminated interval from  
408 423 to 410 ka (129.96–126.45 mbsf). Marginal ice zone species fluctuate between 4% and  
409 14% throughout the record and do not show any trends in abundance changes. The

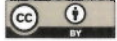

410 grouping of species found both within the ice and in the water surrounding ice, however,  
411 is also somewhat reduced during laminated intervals (Fig. 7).

412

#### 413 4.2.2.2 Warmer Water Species

414 Diatoms associated with warmer water or classified as members of temperate to  
415 subtropical assemblages are rare in this record; however, they are present. This group  
416 includes *Azpeitia tabularis*, *Thalassiosira eccentrica*, *Shionodiscus oestrupii*  
417 (= *Thalassiosira oestrupii*), and *Thalassiosira symmetrica*. (Fryxell and Hasle, 1972;  
418 Lopes et al.; Sancetta; Sancetta and Silvestri, 1986).

419 Relative abundances of warmer water species are quite low throughout the record (<5%),  
420 and are highest (3-4%) during mid to late MIS 11 approximately ~410 to 391 ka (126.74  
421 to 116.50 mbsf) (Fig. 7).

422

#### 423 4.2.2.3 Alaskan Stream Species

424 *Neodenticula seminae* is often used as a tracer of North Pacific water, in particular the  
425 Alaskan Stream (e.g. Caissie et al., 2010; Katsuki and Takahashi, 2005). But its  
426 distribution also varies on glacial-interglacial time scales within the Pacific Ocean  
427 (Sancetta and Silvestri, 1984). It is adapted to the low productivity of the North Pacific  
428 gyre and is heavily silicified which could lead to high proportions of *N. seminae*  
429 reflecting simply dissolution of finely silicified diatoms (Sancetta, 1982, 1981). *N.*  
430 *seminae* is used here as a tracer of Pacific water with the above caveats.

431 Absolute abundances of *N. seminae* began to increase at 422 ka as global eustatic sea  
432 level rises above -50 mpsl. Abundance then decreases slowly over the course of the  
433 Termination V Laminations and peaks again at 392 ka and 382 ka. As sea level drops  
434 below -50 mpsl, *N. seminae* is no longer present at U1345. Relative percent abundances  
435 remain stable at ~2% relative percent abundance between 422 and 400 ka (129.62-123.62  
436 mbsf), then peaks at 13% at 392 ka (121.22 mbsf) (Fig. 6). Low proportions of *N.*  
437 *seminae* during the Termination V Laminations are likely due to the overwhelming  
438 proportion of *Chaetoceros* RS during this time.

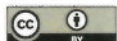

439

#### 440 4.2.2.4 High Productivity Species

441 *Chaetoceros* resting spores are the dominant taxa included in the high productivity group.  
442 *Chaetoceros* RS have been used as indicators of high productivity (e.g. Caissie et al.,  
443 2010) and are often found in locations influenced by intense upwelling (Lopes et al.,  
444 2006; Sancetta, 1982). In addition, *Chaetoceros socialis* can be a common member of the  
445 marginal ice zone bloom (von Quillfeldt, 2001) and a dominant member of the sub ice  
446 bloom (Melnikov et al., 2002). *Chaetoceros furcellatus* is also associated with the  
447 marginal ice zone bloom (von Quillfeldt, 2001). Unfortunately, the morphology of  
448 *Chaetoceros* resting spores is quite variable, and they cannot be classified definitively  
449 without the more labile vegetative cell also present (Tomas, 1996). *Odontella aurita*,  
450 *Thalassionema nitzschioides* are also included in the high productivity group although  
451 they are also associated with the marginal ice zone (von Quillfeldt et al., 2003), areas of  
452 high productivity (Aizawa et al., 2005), and upwelling (Lopes et al., 2006; Sancetta,  
453 1982). [It should be noted that we can not discern between high productivity due to  
454 upwelling and high productivity due to other factors because the diatom proxies are not  
455 sufficiently refined to distinguish between the two.] Yes! Right on!

456 It may be that the combination of upwelling and ice melt at the shelf slope break in the  
457 Bering Sea is responsible for correlation between these two environmental niches. The  
458 spring-blooming *Thalassiosira pacifica* and small (<10  $\mu\text{m}$ ) *Thalassiosira* species round  
459 out the high productivity group due to their associations with high productivity and  
460 upwelling specifically in the Bering Sea and North Pacific (Aizawa et al., 2005; Hay et  
461 al., 2007; Katsuki and Takahashi, 2005; Lopes et al., 2006; McQuoid and Hobson, 2001;  
462 Saito and Taniguchi, 1978).

463 Like *Chaetoceros* RS, high productivity species mimic the trend of the insolation curve  
464 (Berger and Loutre, 1991) with highest relative abundances (60-70%) occurring during  
465 high levels of insolation (Fig. 7). The lowest relative abundances (15-20%) of high  
466 productivity species occur between 403 and 390 ka (124.21 to 120.07 mbsf) when both  
467 obliquity and insolation are low. High productivity species are high during both the  
468 Termination V Laminations and during the late MIS 11 laminations (Fig. 7).



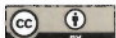

469

#### 470 4.2.2.5 Dicotermal Water Indicators and Late Summer Species

471 A cold layer of water found between seasonally warmer surface and warmer deep water  
472 characterizes dicothermal water. It is stable because of its very low salinity. In the Sea of  
473 Okhotsk and the Bering Sea, the dicothermal layer is often associated with melting sea  
474 ice. The highest abundances of *Shionodiscus trifultus* are found associated with this  
475 highly stratified, cold water in the Sea of Okhotsk today (Sancetta, 1981; Sancetta and  
476 Silvestri, 1986).

477 *Actinocyclus curvatulus* has been observed living in water surrounding sea ice (von  
478 Quillfeldt et al., 2003); however, it is neither a common member of the marginal ice zone  
479 flora, nor is its spatial distribution in the Bering Sea consistent with the distribution of sea  
480 ice (Sancetta, 1982). Its relative percent abundances are more closely associated with  
481 those of *S. trifultus* (Sancetta, 1982), and so it was grouped with *S. trifultus* as an  
482 indicator of dicothermal water.

483 Genera present in the Bering Sea during late summer (*Coscinodiscus*, *Leptocylindrus*,  
484 and *Rhizosolenia*) (Aizawa et al., 2005; Lopes et al., 2006; von Quillfeldt et al., 2003)  
485 tend to co-vary with the dicothermal water indicators, so the two groups were merged for  
486 comparison with other diatom groups.

487 These two groups are highest (18% relative abundance) at ~401 ka (123.62 mbsf) as  
488 insolation declines. This peak is coeval with the peak in fresh water species and an  
489 intermediate peak in *N. seminae* and occurs immediately following a peak in neritic  
490 species. Dicotermal water indicators and summer species are lowest (< 1%) during the  
491 Termination V Laminations (~424-412 ka). Intermediate relative abundances (1% to 5%)  
492 occur during MIS 12 and above 392 ka (121.04 mbsf) (Fig. 7).

493

#### 494 4.2.2.6 Shelf to Basin Transport Indicators

495 Freshwater species are rare, but present in the record. They include the centric species  
496 *Lindavia cf. ocellata* and *L. radiosa* (Håkansson, 2002). Additional freshwater diatoms  
497 found in the record are species also found in sea ice (*S. cf. pinnata*) (von Quillfeldt et al.,

check  
out

Ren et al  
2014 (PPP)

As earlier,  
Fig 6 has this  
labelled as *Cyclotella*

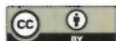

498 2003) or in the neritic zone (*Cyclotella stolorum*) (Barron et al., 2009) and so these  
499 species were placed in the marginal ice zone and neritic groups respectively.

500 The dominant species in the neritic group is *Paralia sulcata*, which is an interesting  
501 species because it can be either planktic or benthic (Kariya et al., 2010) and is associated  
502 both with river deltas and the species *Melosira sol* (Sancetta, 1982). It can be a member  
503 of the marginal ice zone assemblage (von Quillfeldt et al., 2003) though Pushkar (1999)  
504 asserts that *P. sulcata* indicates water shallower than 20 m. Its high abundances in Bering  
505 Strait may mean that it is adapted to moving water (Sancetta, 1982). *P. sulcata* thrives in  
506 water that is warmer than 3 degrees (Zong, 1997), with low light (Blasco et al., 1980) and  
507 low salinity (Ryu et al., 2008).

508 The fresh water group is notably absent from much of the core, but prevalent between  
509 401 and 392 ka (123.70 mbsf and 121.20 mbsf); it reaches its highest relative percent  
510 abundance (12%) at 401 ka (123.62 mbsf). Neritic species, on the other hand maintain  
511 ~10% relative abundance throughout the core. They are lowest during the Termination V  
512 Laminations and increase dramatically around 404 ka (124.61 mbsf) to almost 50% of the  
513 assemblage (Fig. 7).

514

#### 515 4.3 Calcareous Nannofossils

516 Calcareous nannofossils were examined between 432-405 ka (133.4 to 125.0 mbsf); one  
517 third of the samples were barren and only one sample (418 ka; 128.8 mbsf) had sufficient  
518 individuals to estimate relative percent abundances (Fig. 7). This sample is located  
519 midway through the Termination V Laminations when the diatom assemblage is  
520 overwhelmingly dominated by *Chaetoceros* RS. Small *Gephyrocapsa* dominates (>50%)  
521 the calcareous nannofossil assemblage. There are 35% medium *Gephyrocapsa*, 9%  
522 *Coccolithus pelagicus*, and 1% *G. oceanica*.

523

Barron '09  
classifies  
*P. sulcata*  
as "transported  
in the GoAK"  
⊕ see  
complications  
raised by  
Ren '14

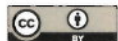

524 **4.4 Geochemistry**

~~Handwritten~~ → missing references to figures

525 **4.4.1 Organic and Inorganic Carbon Content**

526 Total organic carbon (TOC) roughly follows the trend of relative percent abundances of  
527 *Chaetoceros* RS, with higher values during the Termination V Laminations. Mean TOC  
528 value during MIS 12 is 0.76%, and during the Termination V Laminations, it is 1.11%.  
529 TOC decreases [temporarily in sync] with depleted  $\delta^{15}\text{N}$  values, before rising linearly from  
530 404 ka (124.77 mbsf) to 374 ka (115.39 mbsf). TOC is again high during the late MIS  
531 11/MIS 10 laminations.

532 In contrast, inorganic carbon, calculated as %  $\text{CaCO}_3$  is less than 1% for most of the  
533 record; however, it increases up to 3.5% during the laminated intervals and also at 382 ka  
534 (117.87 mbsf), 392 ka (110.00 mbsf), and 408 ka (125.82 mbsf).

535

536 **4.4.2 Terrigenous Input Indicator (C/N)**

→ Molar or atomic?

537 The ratio, C/N is one of two proxies used as indicators of marine versus terrigenous  
538 organic matter, with marine values typically ranging from 5-7 and terrigenous ratios over  
539 20 (Meyers, 1994; Redfield et al., 1963).

540 Throughout the record, C/N indicates primarily a marine source for organic matter.  
541 During MIS 12, C/N is highly variable, when sea level is below -50 m aspl. As sea level  
542 rises during Termination V, C/N values increase from 6 to more than 9. The highest C/N  
543 value occurs at the start of the Termination V Laminations. C/N decreases as sea level  
544 rises until at 400 ka (123.62 mbsf) it stabilizes near 7 for the remainder of the record.

545

546 **4.4.3 Bulk Sedimentary Stable Isotopes**

→ section too brief for those complex data!

547 **4.4.3.1 Carbon Isotopes**

548 Stable isotopes of carbon are also used as an indicator of marine vs. terrigenous organic  
549 matter with  $\delta^{13}\text{C}$  values near -27 indicating C3 plant-sourced organic matter; values  
550 between -22 and -19 are typical for Arctic Ocean marine phytoplankton and -18.3 is  
551 average for ice-related plankton (Schubert and Calvert, 2001). However, it has been

Need cross-plots of  $\delta^{13}\text{C}$ , N/C, +  $\delta^{15}\text{N}$  for the OM source discussion

Both Meyers + Redfield use molar, but EA output is commonly atomic

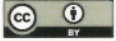

Ref; see (at least) Rau et al. '89  
+ Laws et al. '95

552 shown that  $\delta^{17}\text{C}$  is sometimes related more to growth rate, cell size, and cell membrane  
553 permeability, so it may reflect changing phytoplankton groups instead of simply marine  
554 vs. C3 plant sources of organic matter in U1345.

Statistics?

555 Carbon isotopic values range between -22 ‰ and -26 ‰ and are generally anticorrelated  
556 with C/N values. These values indicate a mix of marine phytoplankton and C3 plants as  
557 the main contributors to organic matter at the site. At the onset of the Termination V  
558 Laminations,  $\delta^{13}\text{C}$  becomes more negative and then gradually increases to a maximum of  
559 -22.33 at 404 ka (124.62). After 400 ka (123.5 mbsf),  $\delta^{13}\text{C}$  is relatively stable around -  
560 23.5‰.

561

#### 562 4.4.3.2 Nitrogen Isotopes

563 Nitrogen, in the form of nitrate, is a key nutrient for phytoplankton growth. Diatoms  
564 preferentially assimilate the lighter isotope,  $^{14}\text{N}$ , which in turn enriches surface waters  
565 with respect to  $^{15}\text{N}$  (Barron et al., 2009; Shiga and Koizumi, 2000). Keeping in mind the  
566 effects of nitrification of oxygen rich and poor sediments (Brunelle et al., 2007), the  
567 efficiency of nitrogen utilization can be estimated by examining the  $^{15}\text{N}/^{14}\text{N}$  ratio of  
568 nitrogen in either bulk sedimentary organic matter, with enriched values of  $\delta^{15}\text{N}$   
569 indicating higher nutrient utilization. Sponge spicules (very low  $\delta^{15}\text{N}$  values) and  
570 radiolarians (highly variable  $\delta^{15}\text{N}$  values) may contaminate the  $\delta^{15}\text{N}$  of bulk organic  
571 matter, however we looked for and found no correlation between spicule abundance and  
572  $\delta^{15}\text{N}$  in our samples.

No  $\delta^{15}\text{N}$   
(or N!)  
in this  
at all!  
Maybe you  
mean

Addison '12?  
in paleoceanography

573 Surprisingly,  $\delta^{15}\text{N}$  is relatively stable throughout the study interval, fluctuating around an  
574 average value of 6.4‰, though there are several notable excursions. Coeval with sea level  
575 rise and increased relative percent *Chaetoceros* RS,  $\delta^{15}\text{N}$  decreased 2.7‰ to 4.4‰ before  
576 recovering to average values during the Termination V Laminations. Two other  
577 depletions occur at 405 ka (124.77 mbsf) and 393 ka (121.62 mbsf), the first is the most  
578 extreme and reaches 2.9‰.

579

This is fairly high, could there be an influence from denitrification?

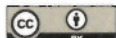

## 580 5 Discussion

581 The study interval can be broken into five zones based on changes in diatom assemblages  
582 and lithology (Fig. 7): MIS 12, Termination V, Peak MIS 11, Beringian Glacial Initiation,  
583 and Late MIS 11. These zones reflect changing sea ice, glacial ice, sea level, and SST and  
584 correspond to events recognized elsewhere in ice cores and marine and lake sediments.

585

### 586 5.1 Marine Isotope Stage 12 and Early Deglaciation (beginning of record to 587 425 ka)

588 The beginning of the record to 425 ka chronicles conditions at the end of MIS 12.  
589 Although diatom accumulation rate is quite low, a relatively diverse assemblage  
590 characterizes this period (Fig. 5) with moderate amounts of sea ice, high productivity, and  
591 dicothermal species (Fig. 7), indicating seasonal sea ice with highly stratified waters  
592 during the ice-melt season. Nitrogen isotopes indicate high nutrient utilization (Fig. 7)  
593 consistent with nitrogen-limited productivity in stratified waters. Similarly, the North  
594 Atlantic was also highly stratified with significantly reduced NADW production (Poli et  
595 al., 2010). High stratification appears to have led to lowered productivity in both the  
596 Atlantic and Pacific.

597 Sea level was low during this interval (Rohling et al., 2010), placing U1345 proximal to  
598 the Beringian coast (Fig. 2). With the Beringian shelf exposed, the continent was  
599 relatively cold and arid (Glushkova, 2001). In western Beringia, Lake El'gygytyn was  
600 perennially covered with ice, summer air temperatures were warming from 4 to 12° C  
601 and annual precipitation was low (200-400 mm) (Vogel et al., 2013).

602 Numerous shell fragments, two sand layers and the highest percentages of clay-sized  
603 sediments in the record were deposited during MIS 12 (Figs 4 and 8) indicating input of  
604 terrigenous material, however, both C/N and  $\delta^{13}\text{C}$  indicate that the organic matter during  
605 MIS 12 is of marine origin. Non-organic, terrigenous material could be transported to  
606 U1345 by large glacial meltwater rivers, icebergs, or sea ice. It is unlikely that meltwater  
607 rivers played a large role in sediment transport at this time because terrigenous organic  
608 matter and fresh water diatoms are absent and there are only moderate amounts of

marked as '09 on Fig. 7

An important source you have neglected is the glacial Yukon River.

Please see  
21 Van Lanningham, '09 in EPSL.

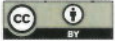

609 diatoms transported from shallow waters (Fig. 8). This may also reflect the reduced area  
610 of submerged continental shelf. In addition, glacial ice was likely restricted to mountain-  
611 valley glaciers, similar to the last glacial maximum (e.g. Glushkova, 2001). These small,  
612 distant glaciers would not have produced large amounts of ice bergs though occasional  
613 glacial ice rafted debris (IRD) may have come from the Koryak Mountains, Aleutians or  
614 Beringia. Consistent with this, sediments typical of glacial IRD, such as dropstones, are  
615 sparse. Terrigenous materials found in MIS12 sediments are most likely evidence of sea  
616 ice rafting which tends to preferentially entrain clay and silt (Reimnitz et al., 1998) or of  
617 minor downslope transport. In contrast, the North Atlantic is surrounded by ice sheets  
618 readily calving ice bergs and MIS 12 is characterized as an intense glacial period with ice  
619 rafted debris found as far south as Bermuda (Poli et al., 2000). Evidence for warming and  
620 the reduction of IRD begins as early as 430 ka in the North Atlantic (Kandiano et al.,  
621 2012) and the strength of the Gulf Stream increases in step with this glacial ice loss  
622 (Chaisson et al., 2002).

623

## 624 **5.2 Early MIS 11: Termination V (425-423 ka)**

625 Termination V is the transition from MIS 12 to MIS 11. Worldwide, it is a rapid  
626 deglaciation that is followed by a long (up to 30 kyrs) climate optimum (Milker et al.,  
627 2013). At U1345, it can be broken into two stages, the first part from 425-423 ka, and the  
628 second part from 423-410 ka, which is notably dominated by laminated sediments and is  
629 discussed in the next section. The first part of Termination V corresponds with a local  
630 maxima in insolation at 65°N (Schimmelmann et al., 1990) and increasing temperatures  
631 in Antarctica (EPICA community members, 2004), the North Atlantic (Voelker et al.,  
632 2010), and globally (Milker et al., 2013).

633 At U1345, the first part of Termination V is expressed as increasing absolute diatom  
634 abundances and relative percent abundance of *Chaetoceros* RS while sea ice diatoms and  
635  $\delta^{15}\text{N}$  values decrease (Fig. 7) indicating gradually increasing productivity coupled with  
636 decreasing nutrient utilization and sea ice.

637 At the same time, episodic increases in productivity were occurring in places as distant as  
638 Lake Baikal (Prokopenko et al., 2010) and the North Atlantic (Chaisson et al., 2002;

From your plots (Fig. 7), it  
looks like there are only 2-3  
data points in this time, and  
gradational  
w.r.t. MIS12.

Is this the evidence for upwelling? Are  
there no  
diatom upwelling  
indicators other  
than  
*Chaetoceros* RS?

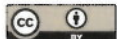

639 Dickson et al., 2009; Poli et al., 2010) and NADW formation was intensifying (Poli et al.,  
640 2010). Ventilation of NADW generally continues to increase from 424 to 410 ka to its  
641 strongest and then weakens over the course of the interglacial (Thunell et al., 2002). In  
642 addition, the flux of terrigenous dust was decreasing near Antarctica reflecting perhaps a  
643 decrease in the strength of Southern Ocean winds (Wolff et al., 2006). [Evidence for  
644 higher productivity in the Bering Sea, possibly caused by intensified upwelling, suggests  
645 teleconnections between NADW formation, the strength of the southern winds, upwelling  
646 in the North Pacific, and northward flow through Bering Strait (e.g. DeBoer and Nof,  
647 2004).

648 } This seems like a stretch for only  
a hand full of data points.

#### 649 5.2.1 Early MIS 11, part 2: Laminations (423-410 ka)

650 The most prominent expression of Termination V is a 3.5 m thick laminated interval  
651 deposited beginning at 423 ka (Fig. 7) when insolation was high at 65°N (Berger and  
652 Loutre, 1991). Its presence indicates that the bottom water at 1,000 m in the Bering Sea  
653 was dysoxic for more than 11 kyrs. These laminations are characterized as Type I  
654 laminations with a notably high diatom content (Fig. 4). Several lines of evidence point  
655 towards high productivity among multiple phytoplankton groups as opposed to simply a  
656 change in preservation. There is a two orders of magnitude increase in diatom  
657 abundances since MIS 12, a low-diversity diatom assemblage dominated by *Chaetoceros*  
658 RS, an abrupt increase in percent organic carbon, high percent CaCO<sub>3</sub> and abundant  
659 calcareous nannofossils dominated by small *Gephyrocapsa*. Furthermore, enriched  $\delta^{15}\text{N}$   
660 values indicate increased nitrogen utilization that likely fed this increased productivity  
661 (Fig. 7). Dysoxia could promote denitrification + elevated  $\delta^{15}\text{N}$

662 Sea ice is reduced during this interval with almost no eponitic diatoms present and  
663 reduced amounts of other sea ice diatoms (Fig. 7). The  $\delta^{13}\text{C}$  pattern of depleted values at  
664 the start of the laminated interval and increasingly enriched values until about 409 ka is  
665 very similar to the C<sub>org</sub>/N <sup>data</sup> story (Fig. 7) reflecting the highest contribution from C3 plant  
666 organic matter at the onset of the laminated interval as the tundra-covered Bering Shelf is  
667 flooded. However, the depletion in  $\delta^{13}\text{C}$  during the Termination V Laminations occurs at

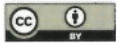

668 the same time that *Chaetoceros* RS overtake the assemblage (Fig. 7), so a species effect  
669 cannot be ruled out.

670 The diatom record, on the other hand has the lowest contribution of neritic diatoms  
671 during the laminated interval and virtually no fresh water diatoms (Fig. 7), suggesting  
672 that although terrigenous organic matter was an important input at the site, coastal, river,  
673 or swamp/tundra diatoms were not major constituents of this terrigenous organic matter.

674 The sum of this evidence of high productivity, reduced sea ice, and terrigenous input is  
675 similar to changes in productivity in this region during Termination I (Brunelle et al.,  
676 2007; Caissie et al., 2010). At the start of Termination I, productivity initially increased  
677 while nitrogen utilization decreased, then an abrupt increase in productivity and nitrogen  
678 utilization was recorded (Brunelle et al., 2007; Brunelle et al., 2010). It is plausible that  
679 increased nitrogen availability drove higher primary productivity as floods scoured fresh  
680 organic matter from the submerging continental shelf (Bertrand et al., 2000). Rapid input  
681 of bioavailable nitrogen as the shelf was inundated has been suggested to explain  
682 increasing productivity during the last deglaciation in the Sea of Okhotsk (Shiga and  
683 Koizumi, 2000) and during MIS 11 in the North Atlantic (Poli et al., 2010) and also may  
684 have contributed to dysoxia by ramping up nutrient recycling, bacterial respiration, and  
685 decomposition of organic matter in the Bering Sea.

686 The brief nitrogen utilization decrease just prior to the laminations (Fig. 7), suggests that  
687 productivity was limited by some other factor, such as light or micronutrients, and could  
688 not increase proportional to the increase in available nitrogen. Lam (2013) suggests that  
689 during the last deglaciation, a breakdown in stratification limited productivity by creating  
690 a very deep mixed layer that extended below the photic zone. This seems possible during  
691 Termination V, since diatom indicators for stratified waters (dicothermal species) and  
692 epontic diatoms decline coeval with the increase in productivity indicators (Fig. 7),  
693 though seasonal sea ice remains and likely provides a mechanism for maintaining  
694 stratification to some extent. As the interglacial began however, we would expect this  
695 light limitation to be removed when stratification was re-established. However, if  
696 dicothermal diatoms are indicators for stratification, then stratification is not re-  
697 established until long after  $\delta^{15}\text{N}$  values increase (Fig. 7), suggesting that if there is a limit



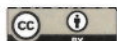

698 on productivity during the early deglacial it is likely not light via a deep mixed layer  
699 (Obata et al., 1996). In contrast, a nearby core (HLY 0202 JPC3) displayed laminated  
700 sediments for only about 500 years during the last deglaciation (Cook et al., 2005),  
701 suggesting that the two Terminations were very different.

702 There is a “Younger Dryas-like” temperature reversal seen midway through Termination  
703 V in the North Atlantic (Voelker et al., 2010), Antarctica (EPICA community members,  
704 2004) and at Lake El’gygytgyn (Vogel et al., 2013), however there is no evidence for  
705 such an event in the Bering Sea.

706

### 707 **5.3 Peak MIS 11 (423-394 ka)**

708 Globally, peak interglacial conditions (often referred to as MIS 11.3 or 11c) are centered  
709 around 410 ka, though the exact interval of the temperature optimum varies and lasted  
710 anywhere from 10 to 30 kyrs (Kandiano et al., 2012; Kariya et al., 2010; Milker et al.,  
711 2013). At U1345, peak interglacial conditions begin during the Termination V  
712 Laminations and continue until 394 ka.

713 Both decreasing  $C_{org}/N$  and increasing  $\delta^{13}C$  indicate that input of terrigenous organic  
714 matter decreases from the onset of the Termination V Laminations until mid MIS 11 (400  
715 ka) at which time the organic matter remains solidly marine sourced for the remainder of  
716 the record (Fig. 7). Sea level is high and the Pacific water indicator, *N. seminae*, is found  
717 at the site beginning at 424 ka.

718 Throughout MIS 11, *Chaetoceros* RS, a species indicative of high productivity, is  
719 generally higher when insolation is higher and lower when insolation is lower (390-404  
720 ka; Fig. 7). However, although their fluctuations are small, warm water species show the  
721 opposite trend, with higher proportions of warm water diatoms when insolation is low  
722 (Fig. 7). If higher proportions of warm water diatoms indicate warmer water, then this  
723 suggests that productivity is highest in colder waters but when insolation is high, and  
724 lowest in warmer waters when insolation is low.

725 During MIS 11c, global ice volume was the lowest that it has been for the past 500 kyrs  
726 (Lisiecki and Raymo, 2005), and generally continental temperatures were warmer than

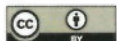

727 today (D'Anjou et al., 2013; de Vernal and Hillaire-Marcel, 2008; Lozhkin and Anderson,  
728 2013; Lyle et al., 2001; Melles et al., 2012; Pol, 2011; Prokopenko et al., 2010; Raynaud  
729 et al., 2005; Tarasov et al., 2011; Tzedakis, 2010; Vogel et al., 2013) with a northward  
730 expansion of boreal forests in Beringia (Kleinen et al., 2014). However, it was not warm  
731 uniformly world-wide. At U1345, the relative percent warm water species suggest that  
732 SSTs during MIS 11c were only slightly warmer than during MIS 12. Indeed, MIS 11 is  
733 not the warmest interglacial in most marine records (Candy et al., 2014). This is  
734 especially evident in the Nordic Seas where MIS 11 SSTs were lower than Holocene  
735 values, although no IRD was deposited between 408 and 398 ka (Bauch et al., 2000).

736 However, MIS 11c was very humid in many places. In the Bering Sea, modeling studies  
737 estimate up to 50 mm more precipitation than today at 410 ka (Kleinen et al., 2014). The  
738 most humid, least continental period recorded in the sediments at Lake Baikal occurs  
739 from 420-405 ka (Prokopenko et al., 2010), and extremely high precipitation are recorded  
740 at Lake El'gygytgyn on the nearby Chukotka Peninsula from 420-400 ka (Melles et al.,  
741 2012). Conditions in Africa during MIS 11c were similar to the Holocene African humid  
742 period. In addition, pollen records from Western Europe also reflect humid environments  
743 (Candy et al., 2014). A warmer, moister climate in Western Europe and Africa is  
744 indicative of increased Atlantic Meridional Overturning Circulation (AMOC) (Bauch,  
745 2013). AMOC appears to be stable over MIS 11 (Milker et al., 2013) as evidenced by  
746 high carbonate in the North Atlantic (Chaisson et al., 2002; Poli et al., 2010).  
747 Interestingly, small carbonate peaks in the Bering Sea are contemporaneous with those on  
748 the Bermuda Rise, suggesting teleconnections between the two regions (Fig. 7). These  
749 conditions are similar to a modern day negative North Atlantic Oscillation (NAO) which  
750 is linked to wet conditions in N. Africa, weaker westerlies, more zonal storm tracks, a dry  
751 Northern Europe, colder Nordic Seas and increased sea ice in the North Atlantic  
752 (Kandiano et al., 2012).

753

### 754 5.3.1 Bering Strait Current Reversal (406-402 ka)

755 Between 405 and 394 ka, there is an unusual diatom assemblage and grain size  
756 distribution at Site U1345. There are several possible explanations for deposition of

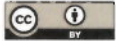

757 shallow water and fresh water species along with large changes in sediment grain size.  
758 We will consider two possibilities in detail: Bering Strait current reversal and glacial  
759 surge in Beringia. *→ Also mention your section 5.3.3 here too.*

760 On St. Lawrence Island in the Northern Bering Sea (Fig. 1), evidence for Arctic mollusks  
761 entering the Gulf of Anadyr suggests that flow through Bering Strait was reversed at  
762 some point during the Middle Pleistocene (Hopkins, 1972). Unfortunately, this event is  
763 poorly dated. If Bering Strait flow were reversed due to a meltwater event (DeBoer and  
764 Nof, 2004), we would expect a temporary reduction in NADW formation and an increase  
765 in southerly winds from Antarctica (DeBoer and Nof, 2004). In the Bering Sea, we would  
766 expect to see an increase in common Arctic or Bering Strait diatom species and a  
767 decrease in North Pacific indicators. *[In addition, the clay minerals in the Arctic Ocean are*  
768 *overwhelmingly dominated by illite (Ortiz et al., 2012), which is a clay mineral that tends*  
769 *to adsorb large amounts of ammonium (Schubert and Calvert, 2001). So, if net flow were*  
770 *to the south, one might also expect to find decreased  $C_{org}/N$  and  $\delta^{15}N$  values resulting*  
771 *from increased illite deposition.]*

772 A warm Arctic Ocean during MIS 11 suggests increased Pacific water input through  
773 Bering Strait (Cronin et al., 2013). Proxy evidence for NADW ventilation (decreases in  
774  $CaCO_3$  % and  $\delta^{13}C$ ) indicates that between 412 and 392 ka, NADW formation decreased  
775 for short periods (< 1 ka) (Poli et al., 2010). In contrast, AABW formation appears to  
776 have drastically slowed around 404 ka, suggesting that winds derived from Antarctica  
777 decreased as opposed to increased (Hall et al., 2001).

778 At U1345,  $C_{org}/N$  values began decreasing linearly starting at 409 ka, productivity  
779 sharply decreases at 406 ka,  $\delta^{15}N$  values are the most depleted at 405 ka, just 1 kyr before  
780 a conspicuous peak in *P. sulcata*, a common diatom in the Bering Strait. Finally, diversity  
781 is highest around 400 ka, due to the multiple contributions of Arctic species (fresh water,  
782 shelf, coastal, sea ice) and common pelagic diatoms, while the North Pacific indicator, *N.*  
783 *seminae* maintains low relative abundances throughout this interval. *[The sum of this*  
784 *evidence ~~does point toward~~ <sup>suggests</sup> species migration from the Arctic Ocean southward.*  
785 However, these changes occur in series over 4 kyrs or more and there is no synchronicity  
786 between NADW formation and Antarctic winds. Therefore, there is no consensus in the

*with*

*Reference Müller, 1977  
in GCA;  
C/N = 1004  
in illite  
XRD!  
(+ ISU  
has one in  
the office  
of Biotech)*

*On Fig. 7,  
it looks  
the same  
before & after  
this period...*

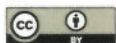

787 evidence to support or reject the hypothesis of reversed flow through Bering Strait during  
788 MIS 11.

789

### 790 5.3.2 Glacial Inception in Beringia (405-394 ka)

791 Regardless of whether flow through Bering Strait reversed during peak MIS 11, the  
792 interval between 405 and 394 ka contains an unusual diatom assemblage and grain size  
793 distribution. Diatom assemblages are similar to that found in sediments from the  
794 Anvillian Transgression 800 km northeast of U1345 near Kotzebue (Fig. 1) (Pushkar et  
795 al., 1999). In the Bering Sea, a large peak in neritic species occurs at 404 ka followed by  
796 the highest relative percentages of fresh water species at the site and a slight increase in  
797 sea ice diatoms from 400 to 394 ka (Fig. 7).

798 Despite the deposition of shallow and fresh water species, the proportion of marine to  
799 terrestrial carbon was the highest in the entire interval. However, primary productivity  
800 was quite low during this interval with high nitrogen utilization reflected in the  $\delta^{15}\text{N}$   
801 values. Two large depletions in  $\delta^{15}\text{N}$  bracket this interval and occur as *Chaetoceros* RS  
802 decrease in relative percent abundance, but only the older depletion is also associated  
803 with a decrease in the number of diatom valves per gram of sediment (Fig. 8). [The older  
804 depletion may reflect an environment that is limited by micronutrients such as iron as sea  
805 level approaches its maximum.] *Just speculation!*

806 Detailed grain size analysis shows a trend of increasing clay sized grains as well as a  
807 broad increase in sand sized grains and in particular grains greater than 250  $\mu\text{m}$  (Fig. 8).  
808 All samples are poorly to very poorly sorted (See Supplemental Material). In addition,  
809 shipboard data shows an increase in the presence of large, isolated clasts > 1 cm in  
810 diameter, a cluster of sand layers (Fig. 8), and a thick interval of silty sand (Takahashi et  
811 al., 2011) around 411 ka (Fig. 4).

812 The sum of this evidence leads us to propose that the interval highlighted in grey on  
813 Figure 8, reflects a glacial advance that may be the onset of the Nome River Glaciation at  
814 ~404 ka. This advance is short-lived in the Bering Sea and is followed by a period when  
815 intensified winds blew fresh water diatoms more than 1000 km off shore to Site U1345.

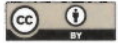

816 Glacial ice is effective at carrying terrigenous and near shore particles far from land.  
817 Previous work has suggested that sediments deposited by icebergs should be poorly  
818 sorted and skew towards coarser sediments (Nürnberg et al., 1994). Sediments greater  
819 than 150 µm are likely glacially ice rafted (St. John, 2008), however it is not possible to  
820 distinguish sediments deposited by glacial versus sea ice on grain size alone (St. John,  
821 2008). Both types of ice commonly carry sand-sized or larger sediments (Nürnberg et al.,  
822 1994). Sea ice diatoms should not be found in glacial ice, instead, we would expect  
823 glacial ice to be either barren, or to carry fresh water diatoms from ice-scoured lake and  
824 pond sediments.

825 The Nome River Glaciation is the most extensive glaciation in central Beringia and is  
826 dated to Middle Pleistocene. Although it has not been precisely dated, it is likely  
827 correlative with MIS 11 (Kaufman et al., 1991; Miller et al., 2009). Nome River  
828 glaciomarine sediments are found in places such as St. Lawrence Island (Gualtieri and  
829 Brigham-Grette, 2001; Hopkins, 1972), the Pribilof Islands (Hopkins, 1966), the Alaska  
830 Arctic coastal plain (Kaufman and Brigham-Grette, 1993), Kotzebue (Huston et al.,  
831 1990), Nome (Kaufman, 1992), and Bristol Bay (Kaufman et al., 2001) (Fig. 1). Mollusks  
832 and pollen in these sediments reflect a tundra environment with temperatures similar to  
833 today (Hopkins, 1972; Kaufman and Brigham-Grette, 1993) or warmer than today  
834 (Pushkar et al., 1999) with significantly reduced or absent sea ice (Kaufman and  
835 Brigham-Grette, 1993; Pushkar et al., 1999). These sites all contain evidence that glaciers  
836 in Beringia advanced, in some cases more than 200 km, and reached tidewater while  
837 eustatic sea level was high (Huston et al., 1990).

838 Although global sea level was near its maximum, and much of the world was  
839 experiencing peak MIS 11 conditions (Candy et al., 2014), there is evidence that the high  
840 latitudes were already cooling. At 410 ka, insolation at 65° N began to decline (Berger  
841 and Loutre, 1991), cooling began at 407 ka in Antarctica, expressed both isotopically and  
842 as an expansion of sea ice (Pol, 2011). Millennial scale cooling events are recorded at  
843 Lake Baikal (Prokopenko et al., 2010). By 405 ka, there is some evidence globally for ice  
844 sheet growth (Milker et al., 2013) as Lake Baikal begins to shift towards a dryer, more  
845 continental climate (Prokopenko et al., 2010) and productivity declines at Lake  
846 El'gygytyn (Melles et al., 2012). Around 400 ka, SSTs decrease temporarily by 2° C in

Whoa! Needs  
Transition  
since preceding  
is all about  
warmth & then  
followed by  
glacial advance  
(= cold &  
and/or precip)

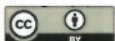

847 the Arctic Ocean (Medeleev Ridge) (Cronin et al., 2013) and permanently at Lake  
848 El'gygytgyn (D'Anjou et al., 2013). Precipitation also decreases at Lake El'gygytgyn  
849 (Melles et al., 2012). Modelling results show that by 400 ka, the Bering Sea is expected  
850 to have temperatures cooler than today with increased sea ice (Kleinen et al., 2014).

851 We suggest that Beringian glaciation during MIS 11 was initiated ~404 ka by decreasing  
852 insolation when eccentricity was high and perihelion coincided with the equinox  
853 (Schimmelmann et al., 1990). Solar forcing coupled with a proximal moisture source, the  
854 flooded Beringian shelf, to drive snow buildup (Huston et al., 1990; Pushkar et al., 1999)  
855 and glacial advance. Precipitation at Lake El'gygytgyn, just west of the Bering Strait, was  
856 two to three times higher than today (Melles et al., 2012). A similar "snow gun"  
857 hypothesis has been invoked for other high latitude glaciations (Miller and De Vernal,  
858 1992); however, Beringia is uniquely situated. Once sea level began to drop, Beringia  
859 became more continental and arid (Prokopenko et al., 2010) and the moisture source for  
860 these glaciers was quickly cut off.

861 In central Beringia, glaciers from coastal mountains on chukotka advanced to St.  
862 Lawrence Island and glaciers from the western Brooks Range advanced into Kotzebue  
863 Sound as global eustatic sea level dropped coincident with decreased insolation during  
864 Northern Hemisphere summers (Berger and Loutre, 1991), Lake El'gygytgyn returned to  
865 glacial conditions by 398 ka, and globally MIS 11.3 ended (Milker et al., 2013; Poli et al.,  
866 2010; Voelker et al., 2010).

Make 2  
sentences

867

### 868 5.3.3 Alternative Explanations

869 There are several other explanations for how these sediments could have been carried  
870 more than 300 km from the coast out over the shelf-slope break and deposited in 1000 m  
871 of water: turbidites or strong density currents on the shelf, sediment reworking and  
872 winnowing, sea ice transport, and eolian deposition

873 The location of Site U1345 on a high interfluvium minimizes the likelihood that sediments  
874 will have been transported and deposited here by turbidites or other down-slope currents.  
875 Sancetta and Robinson (1983) argue that benthic pennate species were transported out of

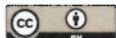

876 shallow water by rivers and turbidity currents during glacial periods. They do not  
877 consider ice as a transport mechanism (Sancetta and Robinson, 1983). If turbidites were  
878 present, we would expect fining up sequences in the detailed grain size analysis,  
879 slumping or distorted sedimentation in the core and clear erosive surfaces. But there is no  
880 evidence of turbidite deposition (Takahashi et al., 2011). If winnowing were a dominant  
881 transport mechanism, the sediments should be well sorted. Instead, the presence of  
882 multiple terrigenous grain sizes indicates that the sediments are relatively poorly sorted  
883 and the Folk and Ward method (Blott and Pye, 2001) classifies all samples as either  
884 poorly sorted or very poorly sorted (See supplemental material).

885 Sea ice could bring neritic (though probably not freshwater) diatoms out to deeper waters  
886 as it preferentially entrains silt and clay size particles (Reimnitz et al., 1998). However, if  
887 there was an increase in sea ice, we would expect to see a significant increase in sea ice  
888 diatoms during this interval. Instead we see only a small increase in sea ice related  
889 species, primarily eponitic species. Additionally, during this time, the marginal ice zone  
890 assemblage is dominated by *T. antarctica* RS which is a taxon primarily found in coastal,  
891 low salinity areas (Barron et al., 2009; Shiga and Koizumi, 2000), so its presence may be  
892 further support for increased shelf to basin transport.

*P. sulcata*  
is also  
thought to  
indicate  
greater  
shelf-to-basin  
transport, too.

893 Eolian deposition of diatoms is a common event in Antarctica where strong katabatic  
894 winds transport mainly small (up to 50  $\mu\text{m}$  in diameter), non-marine diatoms (McKay et  
895 al., 2008). The freshwater diatoms that are abundant between 409 and 405 ka are  
896 dominated by species that tend to be quite small. *Lindavia* cf. *ocellata* ranges from 8-20  
897  $\mu\text{m}$  and *Lindavia radiosa* from 7-35  $\mu\text{m}$ . Wind-driven deposition of these species is the  
898 most probably explanation for their transport more than 800 km from shore, therefore,  
899 this interval may represent a period of time when northerly winds intensified over  
900 Beringia.

901

#### 902 **5.4 Late MIS 11 (younger than 394 ka)**

*Diatom or geochem?*

903 After 394 ka, upwelling indicators are the lowest in the record and linearly increase to the  
904 top of the record. This is in contrast to a slight increase in diatom abundance, which  
905 increases at 393 ka and then remains relatively stable to the top of the record. Sea ice

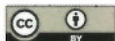

906 indicators also remain relatively high from 392 to the top of the record and dicothermal  
907 species reflect moderately stratified waters. Warm water species decrease from 390 ka to  
908 the top of the record (Fig. 7). The sum of this evidence indicates that at the end of MIS  
909 11, summers were warm and sea ice occurred seasonally, perhaps lasting a bit longer than  
910 at other times in the record. Modelling results indicate that at 394 ka, temperatures were  
911 below modern by 0° to 2° C, and precipitation in Beringia was relatively low, like today  
912 (Kleinen et al., 2014). These patterns reflect general cooling worldwide (de Abreu et al.,  
913 2005; Prokopenko et al., 2010; Raynaud et al., 2005). IRD is again deposited in the North  
914 Atlantic beginning around 390 ka.

915 Eustatic sea level decreased beginning about 402 ka (Rohling et al., 2010), but sea level  
916 was high enough ~~though~~ to allow *N. seminae* to reach the shelf slope break until about  
917 380 ka (Fig. 7). As sea level dropped, significant parts of the Beringian continental shelf  
918 were exposed, cutting off the moisture supply for the Nome River Glaciation (Pushkar et  
919 al., 1999). Subaerial and glaciofluvial deposits above the Nome River tills and correlative  
920 glaciations indicate that Beringian ice retreated, while climate remained cold or grew  
921 colder. Ice wedges and evidence of permafrost are common (Huston et al., 1990; Pushkar  
922 et al., 1999) above Nome River glaciation deposits.

923 Laminations are again prominent in the sediment record and deposited intermittently  
924 between 394 and 392 ka and again after 375 ka (Fig. 4) as the climate transitioned into  
925 MIS 10. These laminations are quite different from the Termination V Laminations due  
926 to their shorter duration and lack of obvious shift in terrigenous vs. marine carbon source.  
927 In addition, these Type II laminations have increased diatom abundances and CaCO<sub>3</sub>, but  
928 not necessarily increased upwelling indicators reflecting increased primary production  
929 that is perhaps not linked to nutrient upwelling along the shelf-slope break.

930 Most of these laminations show an increase in sea ice diatoms and a decrease in  
931 productivity indicators. These roughly correspond with millennial scale stadial events  
932 that occurred during MIS 11a in the North Atlantic (Fig. 7) (Voelker et al., 2010). Late  
933 MIS 11 is characterized as a series of warm and cold cycles (Candy et al., 2014; Voelker  
934 et al., 2010), though there is not agreement on the timing of these cycles.



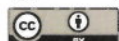

935 It is tantalizing to note that the laminations occur at a time when global sea level was  
936 fluctuating around -50 mpsl (Rohling et al., 2010) (see grey line at -50 m on Fig. 7).  
937 Increased productivity and repeating laminated sediments could be related to shelf to  
938 basin nutrient dynamics as rising sea levels carry fresh organic matter from the shelf out  
939 over the southern Bering Sea (e.g. Bertrand et al., 2000). In addition to the  
940 correspondence between laminations and North Atlantic stadials, carbonate peaks in the  
941 Bering Sea also occur coeval with carbonate peaks at Blake Ridge (Chaisson et al., 2002)  
942 suggesting teleconnections between productivity in the Bering Sea and the North Atlantic  
943 at this time. This suggests that sea level fluctuation driven by the closure of Bering Strait  
944 may also be occurring at the end of MIS 11 as well as during the last glacial maximum  
945 (Hu et al., 2010), though this hypothesis requires further testing ~~and rethinking~~  
946 dynamic topography in the Bering Strait region over time.

947

## 948 **6 Conclusions**

949 The interval between glacial MIS 12 and MIS 10 is marked by large changes in  
950 productivity but minor changes in sea ice extent at the shelf slope break in the Bering  
951 Sea. There is inconclusive evidence for a reversal of the Bering Strait current at 405 ka,  
952 but evidence for teleconnections between the Atlantic and the North Pacific is strong  
953 when eustatic sea level fluctuated near the Bering Strait sill depth at the end of MIS 11.  
954 Tidewater glaciers advanced in Beringia when eustatic sea level was high, insolation was  
955 declining in the Arctic, and other high latitude regions saw decreasing SSTs.

956 During MIS 12, productivity and nitrogen utilization was low. At Termination V, an 11  
957 kyr long laminated interval began. This interval was highly productive for multiple  
958 phytoplankton groups and diatom productivity increased by two orders of magnitude  
959 while nitrogen utilization decreased. The surface waters were relatively warm and  
960 unstratified with reduced sea ice duration. This period is marked by the highest  
961 terrigenous organic matter input of the record possibly due to scouring of the continental  
962 shelf as sea level rose. Throughout much of MIS 11, productivity changed in concert with  
963 changes in insolation and water temperature. During warmer periods, high stratification

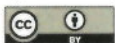

964 appears to have led to lowered productivity in both the Atlantic and the North Pacific  
965 Oceans.

966 During MIS 12, seasonal sea ice dominated the western Bering Sea with highly stratified  
967 waters during the ice-melt season. Sea ice was at a minimum from 423 to 410 ka when  
968 the Termination V Laminations were deposited. After this, although summers appear to  
969 have been warm, seasonal sea ice lasted longer. And at the end of MIS 11, sea ice  
970 increased and cooling continued in sync with declining sea level.

971 While decreased NADW formation and species transport from the Arctic Ocean  
972 southward support a reversal of the Bering Strait current at 405 ka, there is no evidence  
973 for transport of Arctic Ocean clay minerals or an increase in winds in Antarctica. In  
974 addition, oceanographic changes indicative of a shift in Bering Strait through flow occur  
975 in series over 4 kyrs or more and there is no synchronicity with Bering Sea changes,  
976 NADW formation and Antarctic winds. Therefore, there is inconclusive evidence for a  
977 reversal of the Bering Strait current during MIS 11.

Capitalize?

978 When global sea level was at its maximum, insolation dropped slightly and coastal  
979 Beringia began to cool in sync with other polar regions. Tidewater glaciers brought  
980 neritic species far off shore and are attributed to humid conditions in Beringia that  
981 allowed glacial growth. Evidence of glaciation is short lived in the western Bering Sea  
982 and followed by an intensification of northerly winds that brought freshwater diatoms out  
983 over the open ocean.

984 Laminations at end MIS 11 correspond with millennial scale stadials seen in the N  
985 Atlantic. These deposits represent further possible evidence of teleconnections between  
986 the Atlantic and the Pacific as eustatic sea level fluctuated near the Bering Strait sill  
987 depth.

988 This study supports hypotheses that the region responds to insolation changes at 65° N  
989 and that Bering Strait modulates climate in both the North Atlantic and Pacific regions.  
990 Future work should focus on leads and lags between changes in the North Atlantic, North  
991 Pacific and Antarctic regions to determine how upwelling, deep water formation, and  
992 climate are related.

This is  
a very  
strong  
statement

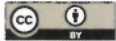

993 Data used in this manuscript are archived at the National Center for Environmental  
994 Information (doi and web address pending).

995

996 **Acknowledgements**

997 The authors thank the captain and crew of the JOIDES Resolution and Exp. 323 co-chief  
998 scientists Christina Ravelo and Kozo Takahashi. This work was partially supported by  
999 National Science Foundation, Office of Polar Programs Arctic Natural Sciences Award  
1000 #1023537 and a Post Expedition Award from the Consortium for Ocean Leadership.

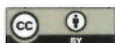

*Note: I did not check references, except Schubert*

1001 **References**

- 1002 Aizawa, C., Tanimoto, M., and Jordan, R. W.: Living diatom assemblages from North  
1003 Pacific and Bering Sea surface waters during summer 1999, Deep-Sea Research Part II-  
1004 Topical Studies in Oceanography, 52, 2186-2205, 2005.
- 1005 Alexander, V. and Chapman, T.: The role of eponitic algal communities in Bering Sea ice.  
1006 In: The Eastern Bering Sea Shelf: Oceanography and Resources, Hood, D. W. and  
1007 Calder, J. A. (Eds.), University of Washington Press, Seattle, Washington, 1981.
- 1008 Armand, L. K., Crosta, X., Romero, O., and Pichon, J. J.: The biogeography of major  
1009 diatom taxa in Southern Ocean sediments: 1. Sea ice related species, Palaeogeography,  
1010 Palaeoclimatology, Palaeoecology, 223, 93-126, 2005.
- 1011 Barron, J. A., Bukry, D., Dean, W. E., Addison, J. A., and Finney, B.: Paleooceanography  
1012 of the Gulf of Alaska during the past 15,000 years: results from diatoms, silicoflagellates,  
1013 and geochemistry, Marine Micropaleontology, 72, 176-195, 2009.
- 1014 Bassinot, F. C., Labeyrie, L. D., Vincent, E., Quidelleur, X., Shackleton, N. J., and  
1015 Lancelot, Y.: (Table 4) Isotopic event stack. In supplement to: The astronomical theory of  
1016 climate and the age of the Brunhes-Matuyama magnetic reversal, Earth and Planetary  
1017 Science Letters, 126, 91-108, 1994.
- 1018 Bauch, H. A.: Interglacial climates and the Atlantic meridional overturning circulation: is  
1019 there an Arctic controversy?, Quaternary Science Reviews, 63, 1-22, 2013.
- 1020 Bauch, H. A., Erlenkeuse, H., Helmke, J. P., and Struck, U.: A paleoclimatic evaluation  
1021 of marine oxygen isotope stage 11 in the high-northern Atlantic (Nordic seas), Global and  
1022 Planetary Change, 24, 27-39, 2000.
- 1023 Berger, A., Crucifix, M., Hodell, D. A., Mangili, C., McManus, J. F., Otto-Bliesner, B.,  
1024 Pol, K., Raynaud, D., Skinner, L. C., Tzedakis, P. C., Wolff, E. W., Yin, Q. Z., Abe-  
1025 Ouchi, A., Barbante, C., Brovkin, V., Cacho, I., Capron, E., Ferretti, P., Ganopolski, A.,

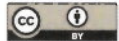

- 1026 Grimalt, J. O., Hönisch, B., Kawamura, K., Landais, A., Margari, V., Martrat, B.,  
1027 Masson-Delmotte, V., Mokeddem, Z., Parrenin, F., Prokopenko, A. A., Rashid, H.,  
1028 Schulz, M., and Vazquez Riveiros, N.: “Interglacials of the last 800,000 years”, *Rev*  
1029 *Geophys*, doi: 10.1002/2015RG000482, 2015. n/a-n/a, 2015.
- 1030 Berger, A. and Loutre, M. F.: Insolation Values for the Climate of the Last 10 Million  
1031 Years, *Quaternary Science Reviews*, 10, 297-317, 1991.
- 1032 Bertrand, P., Pedersen, T. F., Martinez, P., Calvert, S., and Shimmield, G.: Sea level  
1033 impact on nutrient cycling in coastal upwelling areas during deglaciation: evidence from  
1034 nitrogen isotopes, *Global Biogeochemical Cycles*, 14, 341-355, 2000.
- 1035 Blasco, D., Estrada, M., and Jones, B.: Relationship between the phytoplankton  
1036 distribution and composition and the hydrography in the Northwest African upwelling  
1037 region near Cabo Carboeiro, *Deep Sea Research*, 27A, 799-821, 1980.
- 1038 Blott, S. J. and Pye, K.: GRADISTAT: A grain size distribution and statistics package for  
1039 the analysis of unconsolidated sediments, *Earth Surface Processes and Landforms*, 26,  
1040 1237-1248, 2001.
- 1041 Bowen, D. Q.: Sea level ~400 000 years ago (MIS 11): analogue for present and future  
1042 sea-level?, *Clim Past*, 6, 19-29, 2010.
- 1043 Brigham-Grette, J., Hopkins, D. M., Ivanov, V. F., Basilyan, A. E., Benson, S. L., Heiser,  
1044 P. A., and Pushkar, V. S.: Last interglacial (isotope stage 5) glacial and sea-level history  
1045 of coastal Chukotka Peninsula and St. Lawrence Island, Western Beringia, *Quaternary*  
1046 *Science Reviews*, 20, 419-436, 2001.
- 1047 Brunelle, B. G., Sigman, D. M., Cook, M. S., Keigwin, L., Haug, G. H., Plessen, B.,  
1048 Schettler, G., and Jaccard, S. L.: Evidence from diatom-bound nitrogen isotopes for  
1049 subarctic Pacific stratification during the last ice age and a link to North Pacific  
1050 denitrification changes, *Paleoceanography*, 22, 2007.

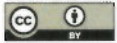

- 1051 Brunelle, B. G., Sigman, D. M., Jaccard, S. L., Keigwin, L. D., Plessen, B., Schettler, G.,  
1052 Cook, M. S., and Haug, G. H.: Glacial/interglacial changes in nutrient supply and  
1053 stratification in the western subarctic North Pacific since the penultimate glacial  
1054 maximum, *Quaternary Science Reviews*, 29, 2579-2590, 2010.
- 1055 Caissie, B. E., Brigham-Grette, J., Lawrence, K. T., Herbert, T. D., and Cook, M. S.: Last  
1056 Glacial Maximum to Holocene sea surface conditions at Umnak Plateau, Bering Sea, as  
1057 inferred from diatom, alkenone, and stable isotope records, *Paleoceanography*, 25,  
1058 10.1029/2008pa001671, 2010.
- 1059 Candy, I., Schreve, D. C., Sherriff, J., and Tye, G. J.: Marine Isotope Stage 11:  
1060 Palaeoclimates, palaeoenvironments and its role as an analogue for the current  
1061 interglacial, *Earth-Science Reviews*, 128, 18-51, 2014.
- 1062 Chaisson, W. P., Poli, M. S., and Thunell, R. C.: Gulf Stream and Western Boundary  
1063 Undercurrent variations during MIS 10 -12 at Site 1056, Blake-Bahama Outer Ridge,  
1064 *Marine Geology*, 189, 79-105, 2002.
- 1065 Cook, M. S., Keigwin, L. D., and Sancetta, C. A.: The deglacial history of surface and  
1066 intermediate water of the Bering Sea, *Deep Sea Research II*, 52, 2163-2173, 2005.
- 1067 Cook, M. S., Ravelo, A. C., Mix, A., Nesbitt, I. M., and Miller, N. V.: Tracing Bering  
1068 Sea circulation with benthic foraminiferal stable isotopes during the Pleistocene, *Deep  
1069 Sea Research Part II: Topical Studies in Oceanography*, In Press. In Press.
- 1070 Cooper, L. W., Whitley, T. E., Grebmeier, J. M., and Wieingartner, T.: The nutrient,  
1071 salinity, and stable oxygen isotope composition of Bering and Chukchi Seas waters in  
1072 and near the Bering Strait, *Journal of Geophysical Research*, 102, 12563-12573, 1997.
- 1073 Cronin, T. M., Polyak, L., Reed, D., Kandiano, E. S., Marzen, R. E., and Council, E. A.:  
1074 A 600-ka Arctic sea-ice record from Mendeleev Ridge based on ostracodes, *Quaternary  
1075 Science Reviews*, 79, 157-167, 2013.

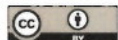

- 1076 D'Anjou, R. M., Wei, J. H., Casteneda, I. S., Brigham-Grette, J., Petsch, S. T., and  
1077 Finkelstein, D. B.: High-latitude environmental change during MIS 9 and 11:  
1078 biogeochemical evidence from Lake El'gygytgyn, Far East Russia, *Clim Past*, 9, 567-581,  
1079 2013.
- 1080 de Abreu, C., Abrantes, F. F., Shackleton, N. J., Tzedakis, P. C., McManus, J. F., Oppo,  
1081 D. W., and Hall, M. A.: Ocean climate variability in the eastern North Atlantic during  
1082 interglacial marine isotope stage 11: A partial analogue to the Holocene?,  
1083 *Paleoceanography*, 20, 10.1029/2004PA001091, 2005.
- 1084 de Vernal, A. and Hillaire-Marcel, C.: Natural variability of Greenland climate,  
1085 vegetation, and ice volume during the past million years, *Science*, 320, 1622-1625, 2008.
- 1086 DeBoer, A. M. and Nof, D.: The Exhaust Valve of the North Atlantic, *Journal of Climate*,  
1087 17, 417-422, 2004.
- 1088 Dickson, A. J., Beer, C. J., Dempsey, C., Maslin, M. A., Bendle, J. A., McClymont, E. L.,  
1089 and Pancost, R. D.: Oceanic forcing of the Marine Isotope Stage 11 interglacial, *Nature*  
1090 *Geoscience*, 2, 428-433, 2009.
- 1091 Droxler, A. W., Alley, R. B., Howard, W. R., Poore, R. Z., and Burckle, L. H.: Unique  
1092 and exceptionally long interglacial Marine Isotope Stage 11: window into Earth's warm  
1093 future climate. In: *Earth's Climate and Orbital Eccentricity: The Marine Isotope Stage 11*  
1094 *Question*, Droxler, A. W., Poore, R. Z., and Burckle, L. H. (Eds.), American Geophysical  
1095 Union, Washington, DC, 2003.
- 1096 EPICA community members: Eight glacial cycles from an Antarctic ice core, *Nature*,  
1097 429, 623-628, 2004.
- 1098 Flores, J. A., Gersonde, R., and Sierro, F. J.: Pleistocene fluctuations in the Agulhas  
1099 Current Retroflexion based on the calcareous plankton record, *Marine*  
1100 *Micropaleontology*, 37, 1-22, 1999.

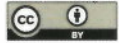

- 1101 Flores, J. A. and Sierro, F. J.: Revised technique for calculation of calcareous nannofossil  
1102 accumulation rates, *Micropaleontology*, 43, 321-324, 1997.
- 1103 Fryxell, G. A. and Hasle, G. R.: *Thalassiosira eccentrica* (Ehreb.) Cleve, *T. symmetrica*  
1104 sp. nov., and some related centric diatoms, *Journal of Phycology*, 8, 297-317, 1972.
- 1105 Glushkova, O. Y.: Geomorphological correlation of Late Pleistocene glacial complexes  
1106 of Western and Eastern Beringia, *Quaternary Science Reviews*, 20, 405-417, 2001.
- 1107 Gualtieri, L. and Brigham-Grette, J.: The age and origin of the Little Diomede Island  
1108 upland surface, *Arctic*, 54, 12-21, 2001.
- 1109 Håkansson, H.: A compilation and evaluation of species in the general *Stephanodiscus*,  
1110 *Cyclostephanos*, and *Cyclotella* with a new genus in the family Stephanodisceaceae,  
1111 *Diatom Research*, 17, 1-139, 2002.
- 1112 Hall, I. R., McCave, L. N., Shackleton, N. J., Weedon, G. P., and Harris, S. E.:  
1113 Intensified deep Pacific inflow and ventilation in Pleistocene glacial times, *Nature*, 412,  
1114 809-812, 2001.
- 1115 Hasle, G. R. and Heimdal, B. R.: Morphology and distribution of the marine centric  
1116 diatom *Thalassiosira antarctica* Comber, *Journal of the Royal Microscopical Society*, 88,  
1117 357-369, 1968.
- 1118 Hay, M. B., Dallimore, A., Thomson, R. E., Calvert, S. E., and Pienitz, R.: Siliceous  
1119 microfossil record of late Holocene oceanography and climate along the west coast of  
1120 Vancouver Island, British Columbia (Canada), *Quaternary Research*, 67, 33-49, 2007.
- 1121 Hopkins, D. M.: Cenozoic Hhistory of the Bering Land Bridge, *Science*, 129, 1519-1528,  
1122 1959.



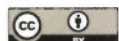

- 1123 Hopkins, D. M.: The paleogeography and climatic history of Beringia during late  
1124 Cenozoic Time, *Internord*, 12, 121-150, 1972.
- 1125 Hopkins, D. M.: Pleistocene glaciation on St. George, Pribilof Islands, *Science*, 1966.  
1126 343-345, 1966.
- 1127 Horner, R.: *Sea Ice Biota*, CRC Press, Inc, Boca Raton, FL, 1985.
- 1128 Hu, A. X., Meehl, G. A., Otto-Bliesner, B. L., Waelbroeck, C., Han, W. Q., Loutre, M.  
1129 F., Lambeck, K., Mitrovica, J. X., and Rosenbloom, N.: Influence of Bering Strait flow  
1130 and North Atlantic circulation on glacial sea-level changes, *Nature Geoscience*, 3, 118-  
1131 121, 2010.
- 1132 Huston, M. M., Brigham-Grette, J., and Hopkins, D. M.: Paleogeographic significance of  
1133 middle Pleistocene glaciomarine deposits on Baldwin Peninsula, northwestern Alaska,  
1134 *Annals of Glaciology*, 14, 111-114, 1990.
- 1135 IPCC (Ed.): *Climate Change 2013: The Physical Science Basis. Contribution of Working*  
1136 *Group I to the Fifth Assessment Report of the Intergovernmental Panel on Climate*  
1137 *Change*, Cambridge University Press, Cambridge, U.K. and New York, NY, USA, 2013.
- 1138 Jouzel, J., Masson-Delmotte, V., Cattani, O., Dreyfus, G., Falourd, S., Hoffmann, G.,  
1139 Minster, B., Nouet, J., Barnola, J. M., Chappellaz, J., Fischer, H., Gallet, J. C., Johnsen,  
1140 S., Leuenberger, M., Loulergue, L., Luethi, D., Oerter, H., Parrenin, F., Raisbeck, G.,  
1141 Raynaud, D., Schilt, A., Schwander, J., Selmo, E., Souchez, R., Spahni, R., Stauffer, B.,  
1142 Steffensen, J. P., Stenni, B., Stocker, T. F., Tison, J. L., Werner, M., and Wolff, E. W.:  
1143 Orbital and millennial Antarctic climate variability over the past 800,000 years, *Science*,  
1144 317, 793-796, 2007.
- 1145 Kandiano, E. S., Bauch, H. A., Fahl, K., Helmke, J. P., Roehl, U., Perez-Folgado, M., and  
1146 Cacho, I.: The meridional temperature gradient in the eastern North Atlantic during MIS

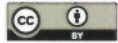

- 1147 11 and its link to the ocean-atmosphere system, *Palaeogeography Palaeoclimatology*  
1148 *Palaeoecology*, 333, 24-39, 2012.
- 1149 Kariya, C., Hyodo, M., Tanigawa, K., and Sato, H.: Sea-level variation during MIS 11  
1150 constrained by stepwise Osaka Bay extensions and its relation with climatic evolution,  
1151 *Quaternary Science Reviews*, 29, 1863-1879, 2010.
- 1152 Katsuki, K. and Takahashi, K.: Diatoms as paleoenvironmental proxies for seasonal  
1153 productivity, sea-ice and surface circulation in the Bering Sea during the late Quaternary,  
1154 *Deep Sea Research II*, 52, 2110-2130, 2005.
- 1155 Kaufman, D. S.: Aminostratigraphy of Pliocene-Pleistocene high-sea-level deposits,  
1156 Nome coastal plain and adjacent nearshore area, Alaska, *Geological Society of America*  
1157 *Bulletin*, 104, 40-52, 1992.
- 1158 Kaufman, D. S. and Brigham-Grette, J.: Aminostratigraphic correlations and  
1159 paleotemperature implications, Pliocene-Pleistocene high sea-level deposits,  
1160 *Northwestern Alaska, Quaternary Science Reviews*, 12, 21-33, 1993.
- 1161 Kaufman, D. S., Manley, W. F., Forman, S. L., and Layer, P. W.: Pre-Late-Wisconsin  
1162 glacial history, coastal Ahklun Mountains, southwestern Alaska - new amino acid,  
1163 thermoluminescence, and  $^{40}\text{Ar}/^{39}\text{Ar}$  results, *Quaternary Science Reviews*, 20, 337-352,  
1164 2001.
- 1165 Kaufman, D. S., Walter, R. C., Brigham-Grette, J., and Hopkins, D. M.: Middle  
1166 Pleistocene age of the Nome River glaciation, northwestern Alaska, *Quaternary*  
1167 *Research*, 36, 277-293, 1991.
- 1168 Kim, S., Takahashi, K., Khim, B.-K., Kanematsu, Y., Asahi, H., and Ravelo, A. C.:  
1169 Biogenic opal production changes during the Mid-Pleistocene Transition in the Bering  
1170 Sea (IODP Expedition 323 Site U1343), *Quaternary Research*, 81, 151-157, 2014.

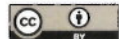

- 1171 Kindler, P. and Hearty, P. J.: Elevated marine terraces from Eleuthera (Bahamas) and  
1172 Bermuda: sedimentological, petrographic, and geochronological evidence for important  
1173 deglaciation events during the middle Pleistocene, *Global and Planetary Change*, 24, 41-  
1174 58, 2000.
- 1175 Kleinen, T., Hildebrandt, S., Prange, M., Rachmayani, R., Mueller, S., Bezrukova, E.,  
1176 Brovkin, V., and Tarasov, P. E.: The climate and vegetation of Marine Isotope Stage 11-  
1177 Model results and proxy-based reconstructions at global and regional scale, *Quaternary*  
1178 *International*, 348, 247-265, 2014.
- 1179 Koizumi, I.: The Late Cenozoic diatoms of Sites 183-193, Leg 19 Deep Sea Drilling  
1180 Project, *Initial Reports of the Deep Sea Drilling Project*, 19, 805-855, 1973.
- 1181 Kowalik, Z.: Bering Sea Tides. In: *Dynamics of the Bering Sea*, Loughlin, T. R. and  
1182 Ohtani, K. (Eds.), University of Alaska Sea Grant, Fairbanks, AK, 1999.
- 1183 Lam, P. J., Robinson, L. F., Blusztajn, J., Li, C., Cook, M. S., McManus, J. F., and  
1184 Keigwin, L. D.: Transient stratification as the cause of the North Pacific productivity  
1185 spike during deglaciation, *Nature Geoscience*, 6, 622-626, 2013.
- 1186 Lisiecki, L. E. and Raymo, M. E.: A Pliocene-Pleistocene stack of 57 globally distributed  
1187 benthic delta O-18 records, *Paleoceanography*, 20, 10.1029/2004PA001071, 2005.
- 1188 Lopes, C., Mix, A. C., and Abrantes, F.: Diatoms in northeast Pacific surface sediments  
1189 as paleoceanographic proxies, *Marine Micropaleontology*, 60, 45-65, 2006.
- 1190 Loutre, M. F. and Berger, A.: Marine Isotope Stage 11 as an analogue for the present  
1191 interglacial, *Global and Planetary Change*, 36, 209-217, 2003.
- 1192 Lozhkin, A. V. and Anderson, P.: Vegetation responses to interglacial warming in the  
1193 Arctic: examples from Lake El'gygytgyn, Far East Russian Arctic, *Clim Past*, 9, 1211-  
1194 1219, 2013.

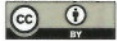

- 1195 Lundholm, N. and Hasle, G. R.: Are *Fragilariopsis cylindrus* and *Fragilariopsis nana*  
1196 bipolar diatoms? Morphological and molecular analyses of two sympatric species, Nova  
1197 Hedwigia, 133, 231-250, 2008.
- 1198 Lundholm, N. and Hasle, G. R.: *Fragilariopsis* (Bacillariophyceae) of the Northern  
1199 Hemisphere--morphology, taxonomy, phylogeny and distribution, with a description of  
1200 *F. pacifica* sp. nov., Phycologia, 49, 438-460, 2010.
- 1201 Lyle, M., Heusser, L., Herbert, T., Mix, A. C., and Barron, J.: Interglacial theme and  
1202 variations: 500 k.y. of orbital forcing and associated responses from the terrestrial and  
1203 marine biosphere, U.S. Pacific Northwest, Geology, 29, 1115-1118, 2001.
- 1204 Manley, W. F., Kaufman, D. S., and Briner, J. P.: Pleistocene glacial history of the  
1205 southern Ahklun Mountains, southwestern Alaska: Soil-development, morphometric, and  
1206 radiocarbon constraints, Quaternary Science Reviews, 20, 353-370, 2001.
- 1207 Maurer, B. A. and McGill, B. J.: Chapter 5: measurement of species diversity. In:  
1208 Biological Diversity, Magurran, A. E. and McGill, B. J. (Eds.), Oxford University Press,  
1209 New York, 2011.
- 1210 McKay, R. M., Barrett, P. J., Harper, M. A., and Hannah, M. J.: Atmospheric transport  
1211 and concentration of diatoms in surficial and glacial sediments of the Allan Hills,  
1212 Transantarctic Mountains, Palaeogeography, Palaeoclimatology, Palaeoecology, 260,  
1213 168-183, 2008.
- 1214 McManus, J., Oppo, D. W., Cullen, J. L., and Healey, S.: Marine Isotope Stage 11 (MIS  
1215 11): analog for Holocene and future climate. In: Earth's Climate and Orbital Eccentricity:  
1216 The Marine Isotope Stage 11, Droxler, A. W., Poore, R. Z., and Burkle, L. H. (Eds.),  
1217 Geophysical Monograph 137, American Geophysical Union, Washington, DC, 2003.

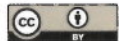

- 1218 McQuoid, M. R. and Hobson, L. A.: A Holocene record of diatom and silicoflagellate  
1219 microfossils in sediments of Saanich Inlet, ODP Leg 169S, *Marine Geology*, 174, 111-  
1220 123, 2001.
- 1221 Medlin, L. K. and Hasle, G. R.: Some *Nitzschia* and related diatom species from fast ice  
1222 samples in the Arctic and Antarctic, *Polar Biology*, 10, 451-479, 1990.
- 1223 Medlin, L. K. and Priddle, J.: *Polar Marine Diatoms*, British Antarctic Survey, Natural  
1224 Environment Research Council, Cambridge, 1990.
- 1225 Melles, M., Brigham-Grette, J., Minyuk, P., Nowaczyk, N. R., Wennrich, V., DeConto,  
1226 R. M., Anderson, P. M., Andreev, A. A., Coletti, A., Cook, T. L., Haltia-Hovi, E.,  
1227 Kukkonen, M., Lozhkin, A. V., Rosen, P., Tarasov, P. E., Vogel, H., and Wagner, B.: 2.8  
1228 Million years of Arctic climate change from Lake El'gygytgyn, NE Russia, *Science*,  
1229 2012. 2012.
- 1230 Melnikov, I. A., Kolosova, E. G., Welch, H. E., and Zhitina, L. S.: Sea ice biological  
1231 communities and nutrient dynamics in the Canada Basin of the Arctic Ocean, *Deep-Sea*  
1232 *Research Part I-Oceanographic Research Papers*, 49, 1623-1649, 2002.
- 1233 Meyers, P. A.: Preservation of elemental and isotopic source identification of  
1234 sedimentary organic matter, *Chemical Geology*, 114, 289-302, 1994.
- 1235 Milker, Y., Rachmayani, R., Weinkauff, M. F. G., Prange, M., Raitzsch, M., Schulz, M.,  
1236 and Kucera, M.: Global and regional sea surface temperature trends during Marine  
1237 Isotope Stage 11, *Clim Past*, 9, 2231-2252, 2013.
- 1238 Miller, G. H., Brigham-Grette, J., Anderson, L., Bauch, H. A., Douglas, M. A., Edwards,  
1239 M. E., Elias, S. A., Finney, B. P., Funder, S., Herbert, T., Hinzman, L. D., Kaufman, D.  
1240 K., MacDonald, G. M., Robock, A., Serreze, M. C., Smol, J. P., Spielhagen, R. F., Wolfe,  
1241 A. P., and Wolff, E. W.: Temperature and precipitation history of the Arctic. In: *Past*

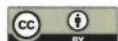

- 1242 Climate Variability and Change in the Arctic and at High Latitudes, Research, U. S. C. C.  
1243 P. a. S. o. G. C. (Ed.), U.S. Geological Survey, Reston, VA, 2009.
- 1244 Miller, G. H. and De Vernal, A.: Will greenhouse warming lead to Northern Hemisphere  
1245 ice-sheet growth?, *Nature*, 355, 244-246, 1992.
- 1246 Naish, T., Powell, R., Levy, R., Wilson, G., Scherer, R., Talarico, F., Krissek, L.,  
1247 Niessen, F., Pompilio, M., Wilson, T., Carter, L., DeConto, R., Huybers, P., McKay, R.,  
1248 Pollard, D., Ross, J., Winter, D., Barrett, P., Browne, G., Cody, R., Cowan, E., Crampton,  
1249 J., Dunbar, G., Dunbar, N., Florindo, F., Gebhardt, C., Graham, I., Hannah, M., Hansaraj,  
1250 D., Harwood, D., Helling, D., Henrys, S., Hinnov, L., Kuhn, G., Kyle, P., Laufer, A.,  
1251 Maffioli, P., Magens, D., Mandernack, K., McIntosh, W., Millan, C., Morin, R.,  
1252 Ohneiser, C., Paulsen, T., Persico, D., Raine, I., Reed, J., Riesselman, C., Sagnotti, L.,  
1253 Schmitt, D., Sjunneskog, C., Strong, P., Taviani, M., Vogel, S., Wilch, T., and Williams,  
1254 T.: Obliquity-paced Pliocene West Antarctic ice sheet oscillations, *Nature*, 458, 322-  
1255 U384, 2009.
- 1256 Normack, W. R. and Carlson, P. R.: Giant submarine canyons: is size any clue to their  
1257 importance in the rock record? In: Geological Society of America Special Paper, Chan,  
1258 M. A. and Archer, A. W. (Eds.), Geological Society of America, Boulder, CO, 2003.
- 1259 Nürnberg, D., Wollenburg, I., Dethleff, D., Eicken, H., Kassens, H., Letzig, T., Reimnitz,  
1260 E., and Thiede, J.: Sediments in Arctic Sea-Ice - Implications for Entrainment, Transport  
1261 and Release, *Marine Geology*, 119, 185-214, 1994.
- 1262 Obata, A., Ishizaka, J., and Endoh, M.: Global verification of critical depth theory for  
1263 phytoplankton bloom with climatological in situ temperature and satellite ocean color  
1264 data, *Journal of Geophysical Research*, 101, 20657-20667, 1996.
- 1265 Onodera, J. and Takahashi, K.: Diatoms and siliceous flagellates (silicoflagellates,  
1266 ebridians, and endoskeletal dinoflagellate *Actiniscus*) from the Subarctic Pacific,

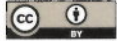

- 1267    Memoirs of the Faculty of Sciences Kyushu University., Series D, Earth and Planetary  
1268    Sciences, 31, 105-136, 2007.
- 1269    Ortiz, J. D., Nof, D., Polyak, L., St-Onge, G., Lisé-Pronovost, A., Naidu, S., Darby, D.,  
1270    and Brachfeld, S.: The Late Quaternary Flow through the Bering Strait Has Been Forced  
1271    by the Southern Ocean Winds, *Journal of Physical Oceanography*, 42, 2014-2029, 2012.
- 1272    Pike, J., Crosta, X., Maddison, E. J., Stickley, C. E., Denis, D., Barbara, L., and Renssen,  
1273    H.: Observations on the relationship between the Antarctic coastal diatoms *Thalassiosira*  
1274    *antarctica* Comber and *Porosira glacialis* (Grunow) Jorgensen and sea ice concentrations  
1275    during the late Quaternary, *Marine Micropaleontology*, 73, 14-25, 2009.
- 1276    Pol, K.: Links between MIS 11 millennial to sub-millennial climate variability and long  
1277    term trends as revealed by new high resolution EPICA Dome C deuterium data - A  
1278    comparison with the Holocene, *Clim Past*, 7, 437-450, 2011.
- 1279    Poli, M. S., Meyers, P. A., and Thunell, R. C.: The western North Atlantic record of MIS  
1280    13 to 10: Changes in primary productivity, organic carbon accumulation and benthic  
1281    foraminiferal assemblages in sediments from the Blake Outer Ridge (ODP Site 1058),  
1282    *Palaeogeography, Palaeoclimatology, Palaeoecology*, 295, 89-101, 2010.
- 1283    Poli, M. S., Thunell, R. C., and Rio, D.: Millennial-scale changes in North Atlantic Deep  
1284    Water circulation during Marine Isotope Stages 11 and 12: linkage to Antarctic climate,  
1285    *Geology*, 28, 807-810, 2000.
- 1286    Pollard, D. and DeConto, R. M.: Modelling West Antarctic ice sheet growth and collapse  
1287    through the past five million years, *Nature*, 458, 329-U389, 2009.
- 1288    Prokopenko, A. A., Bezrukova, E. V., Khursevich, G. K., Solotchina, E. P., Kuzmin, M.  
1289    I., and Tarasov, P. E.: Climate in continental interior Asia during the longest interglacial  
1290    of the past 500 000 years: the new MIS 11 records from Lake Baikal, SE Siberia, *Clim*  
1291    *Past*, 6, 31-48, 2010.

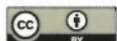

- 1292 Pushkar, V. S., Roof, S. R., Cherepanova, M. V., Hopkins, D. M., and Brigham-Grette,  
1293 J.: Paleogeographic and paleoclimatic significance of diatoms from Middle Pleistocene  
1294 marine and glaciomarine deposits on Baldwin Peninsula, northwestern Alaska,  
1295 *Palaeogeography, Palaeoclimatology, Palaeoecology*, 152, 67-85, 1999.
- 1296 Raymo, M. E. and Mitrovica, J. X.: Collapse of polar ice sheets during the stage 11  
1297 interglacial, *Nature*, 483, 453-456, 2012.
- 1298 Raymo, M. E., Mitrovica, J. X., O'Leary, M. J., DeConto, R. M., and Hearty, P. J.:  
1299 Departures from eustasy in Pliocene sea-level records, *Nature Geoscience*, 4, 328-332,  
1300 2011.
- 1301 Raynaud, D., Barnola, J. M., Souchez, R., Lorrain, R., Petit, J. R., Duval, P., and  
1302 Lipenkov, V. Y.: The record for Marine Isotopic Stage 11, *Nature*, 436, 39-40, 2005.
- 1303 Redfield, A. C., Ketchum, B. H., and Richards, F. A.: The influence of organisms on the  
1304 composition of sea water. In: *The Sea*, Hill, M. N. (Ed.), Wiley, New York, 1963.
- 1305 Reimnitz, E., McCormick, M., Bischof, J., and Darby, D. A.: Comparing sea-ice  
1306 sediment load with Beaufort Sea shelf deposits: is entrainment selective?, *Journal of*  
1307 *Sedimentary Research*, 68, 777-787, 1998.
- 1308 Rohling, E. J., Braun, K., Grant, K., Kucera, M., Roberts, A. P., Siddall, M., and  
1309 Trommer, G.: Comparison between Holocene and Marine Isotope Stage-11 sea-level  
1310 histories, *Earth and Planetary Science Letters*, 291, 97-105, 2010.
- 1311 Rohling, E. J., Fenton, M., Jorissen, F. J., Bertrand, P., Ganssen, G., and Caulet, J. P.:  
1312 Magnitudes of sea-level lowstands of the past 500,000 years, *Nature*, 394, 162-165, 1998.
- 1313 Ryu, E., Lee, S. J., Yang, D. Y., and Kim, J. Y.: Paleoenvironmental studies of the  
1314 Korean peninsula inferred from diatom assemblages, *Quaternary International*, 176-177,  
1315 36-45, 2008.



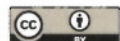

- 1316 Saito, K. and Taniguchi, A.: Phytoplankton communities in the Bering Sea and adjacent  
1317 seas II: spring and summer communities in seasonally ice-covered areas, *Astarte*, 11, 27-  
1318 35, 1978.
- 1319 Sancetta, C. A.: Distribution of diatom species in surface sediments of the Bering and  
1320 Okhotsk seas, *Micropaleontology*, 28, 221-257, 1982.
- 1321 Sancetta, C. A.: Oceanographic and ecologic significance of diatoms in surface sediments  
1322 of the Bering and Okhotsk seas, *Deep Sea Research*, 28A, 789-817, 1981.
- 1323 Sancetta, C. A.: Oceanography of the North Pacific during the Last 18,000 Years:  
1324 Evidence from Fossil Diatoms, *Marine Micropaleontology*, 4, 103-123, 1979.
- 1325 Sancetta, C. A.: Three species of *Coscinodiscus* Ehrenberg from North Pacific sediments  
1326 examined in the light and scanning electron microscopes, *Micropaleontology*, 33, 230-  
1327 241, 1987.
- 1328 Sancetta, C. A. and Robinson, S. W.: Diatom evidence on Wisconsin and Holocene  
1329 events in the Bering Sea, *Quaternary Research*, 20, 232-245, 1983.
- 1330 Sancetta, C. A. and Silvestri, S. M.: Diatom stratigraphy of the Late Pleistocene  
1331 (Brunhes) Subarctic Pacific, *Marine Micropaleontology*, 9, 263-274, 1984.
- 1332 Sancetta, C. A. and Silvestri, S. M.: Pliocene-Pleistocene evolution of the North Pacific  
1333 ocean-atmosphere system, interpreted from fossil diatoms, *Paleoceanography*, 1, 163-  
1334 180, 1986.
- 1335 Schandelmeier, L. and Alexander, V.: An analysis of the influence of ice on spring  
1336 phytoplankton population structure in the southeast Bering Sea, *Limnology and*  
1337 *Oceanography*, 26, 935-943, 1981.

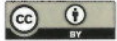

- 1338 Scherer, R. P.: A new method for the determination of absolute abundance of diatoms  
1339 and other silt-sized sedimentary particles, *Journal of Paleolimnology*, 12, 171-179, 1994.
- 1340 Scherer, R. P., Aldahan, A., Tulaczyk, S., Possnert, G., Engelhardt, H., and Kamb, B.:  
1341 Pleistocene collapse of the West Antarctic Ice Sheet, *Science*, 281, 82-85, 1998.
- 1342 Schimmelmann, A., Lange, C. B., and Berger, W. H.: Climatically Controlled Marker  
1343 Layers in Santa-Barbara Basin Sediments and Fine-Scale Core-to-Core Correlation,  
1344 *Limnology and Oceanography*, 35, 165-173, 1990.
- 1345 Schrader, H. J. and Gersonde, R.: Diatoms and silicoflagellates. In: *Micropaleontological*  
1346 *counting methods and techniques - an exercise on an eight metres section of the Lower*  
1347 *Pliocene of Capo Rossello, Sicily*, Zachariasse, W. J., Riedel, W. R., Sanfilippo, A.,  
1348 Schmidt, R. R., Brolsma, M. J., Schrader, H. J., Gersonde, R., Drooger, M. M., and  
1349 Broekman, J. A. (Eds.), *Utrecht Micropaleontological Bulletin*, Netherlands, 1978.
- 1350 Schubert, C. J. and Calvert, S. E.: Nitrogen and carbon isotopic composition of marine  
1351 and terrestrial organic matter in Arctic Ocean sediments: implications for nutrient  
1352 utilization and organic matter composition, *Deep Sea Research I*, 48, 789-810, 2001.
- 1353 Schumacher, J. D. and Stabeno, P. J.: Continental shelf of the Bering Sea. In: *The sea*,  
1354 Robinson, A. R. and Brink, K. H. (Eds.), John Wiley and Sons, New York, 1998.
- 1355 Shiga, K. and Koizumi, I.: Latest Quaternary oceanographic changes in the Okhotsk Sea  
1356 based on diatom records, *Marine Micropaleontology*, 38, 91-117, 2000.
- 1357 Smol, J. P.: The paleolimnologist's Rosetta Stone: calibrating indicators to environmental  
1358 variables using surface-sediment training sets. In: *Pollution of lakes and rivers: a*  
1359 *paleoenvironmental perspective*, Smol, J. P. (Ed.), Key issues in environmental change,  
1360 Oxford University Press, New York, 2002.

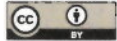

- 1361 Springer, A. M., McRoy, C. P., and Flint, M. V.: The Bering Sea green belt: shelf edge  
1362 processes and ecosystem production, *Fisheries Oceanography*, 5, 205-223, 1996.
- 1363 St. John, K.: Cenozoic ice-rafting history of the central Arctic Ocean: Terrigenous sands  
1364 on the Lomonosov Ridge, *Paleoceanography*, 23, 10.1029/2007pa001483, 2008.
- 1365 Stabeno, P. J., Schumacher, J. D., and Ohtani, K.: The physical oceanography of the  
1366 Bering Sea. In: *Dynamics of the Bering Sea: a summary of physical, chemical, and*  
1367 *biological characteristics, and a synopsis of research on the Bering Sea*, Loughlin, T. R.  
1368 and Ohtani, K. (Eds.), University of Alaska Sea Grant, Fairbanks, AK, 1999.
- 1369 Syvertsen, E. E.: Resting Spore Formation in Clonal Cultures of *Thalassiosira antarctica*  
1370 *Comber*, *T. nordenskiöldii* Cleve and *Detonula confervacea* (Cleve) Gran, *Nova*  
1371 *Hedwigia*, 64, 41-63, 1979.
- 1372 Takahashi, K., Ravelo, A. C., Alvarez Zarikian, C. A., and Scientists, E.: Proceedings of  
1373 the Integrated Ocean Drilling Program. Tokyo, 2011.
- 1374 Tarasov, P. E., Nakagawa, T., Demske, D., Österle, H., Igarashi, Y., Kitagawa, J.,  
1375 Mokhova, L., Bazarova, V., Okuda, M., Gotanda, K., Miyoshi, N., Fujiki, T., Takemura,  
1376 K., Yonenobu, H., and Fleck, A.: Progress in the reconstruction of Quaternary climate  
1377 dynamics in the Northwest Pacific: A new modern analogue reference dataset and its  
1378 application to the 430-kyr pollen record from Lake Biwa, *Earth-Science Reviews*, 108,  
1379 64-79, 2011.
- 1380 Ternois, Y., Kawamura, K., Keigwin, L., Ohkouchi, N., and Nakatsuka, T.: A biomarker  
1381 approach for assessing marine and terrigenous inputs to the sediments of Sea of Okhotsk  
1382 for the last 27,000 years, *Geochimica et Cosmochimica Acta*, 65, 791-802, 2001.
- 1383 Thunell, R., Poli, M. S., and Rio, D.: Changes in deep and intermediate water properties  
1384 in the western North Atlantic during Marine Isotope Stages 11-12: evidence from ODP  
1385 Leg 172, *Marine Geology*, 189, 63-77, 2002.

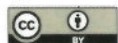

- 1386 Tomas, C. R.: Identifying marine diatoms and dinoflagellates, Academic Press, Inc.  
1387 Harcourt Brace and Co., Boston, U.S.A., 1996.
- 1388 Tzedakis, P. C.: The MIS 11 – MIS 1 analogy, southern European vegetation,  
1389 atmospheric methane and the “early anthropogenic hypothesis”, *Clim Past*, 6, 131-144,  
1390 2010.
- 1391 van Hengstum, P. J., Scott, D. B., and Javaux, E. J.: Foraminifera in elevated Bermudian  
1392 caves provide further evidence for +21m eustatic sea level during Marine Isotope Stage  
1393 11, *Quaternary Science Reviews*, 28, 1850-1860, 2009.
- 1394 Voelker, A. H. L., Rodrigues, T., Billups, K., Oppo, D., McManus, J., Stein, R., Hefter,  
1395 J., and Grimalt, J. O.: Variations in mid-latitude North Atlantic surface water properties  
1396 during the mid-Brunhes (MIS 9–14) and their implications for the thermohaline  
1397 circulation, *Clim Past*, 6, 531-552, 2010.
- 1398 Vogel, H., Meyer-Jacob, C., Melles, M., Brigham-Grette, J., Andreev, A. A., Wennrich,  
1399 V., Tarasov, P. E., and Rosen, P.: Detailed insight into Arctic climatic variability during  
1400 MIS 11c at Lake El'gygytgyn, NE Russia, *Clim Past*, 9, 1467-1479, 2013.
- 1401 von Quillfeldt, C. H.: Identification of some easily confused common diatom species in  
1402 Arctic spring blooms, *Botanica Marina*, 44, 375-389, 2001.
- 1403 von Quillfeldt, C. H., Ambrose, W. G. J., and Clough, L. M.: High number of diatom  
1404 species in first-year ice from the Chukchi Sea, *Polar Biology*, 26, 806-818, 2003.
- 1405 Witkowski, A., Lange-Bertalot, H., and Metzeltin, D.: *Diatom Flora of Marine Coasts I*,  
1406 A.R.G. Gantner Verlag K.G., Ruggell, Liechtenstein, 2000.
- 1407 Wolff, E. W., Fischer, H., Fundel, F., Ruth, U., Twarloh, B., Littot, G. C., Mulvaney, R.,  
1408 Rothlisberger, R., de Angelis, M., Boutron, C. F., Hansson, M., Jonsell, U., Hutterli, M.  
1409 A., Lambert, F., Kaufmann, P., Stauffer, B., Stocker, T. F., Steffensen, J. P., Bigler, M.,

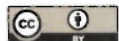

- 1410 Siggaard-Andersen, M. L., Udisti, R., Becagli, S., Castellano, E., Severi, M., Wagenbach,  
1411 D., Barbante, C., Gabrielli, P., and Gaspari, V.: Southern Ocean sea-ice extent,  
1412 productivity and iron flux over the past eight glacial cycles, *Nature*, 440, 491-496, 2006.
- 1413 Young, J. R., Geisen, M., Cros, L., Keleijne, A., Sprengel, C., Probert, I., and  
1414 Østengaard, J.: A guide to extant coccolithophore taxonomy, *Journal of Nannoplankton*  
1415 *Research*, Special Issue, 1, 1-125, 2003.
- 1416 Zong, Y.: Implications of *Paralia sulcata* abundance in Scottish isolation basins, *Diatom*  
1417 *Research*, 12, 125-150, 1997.
- 1418

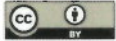

1419 Table 1: Bering Sea diatom species grouped by environmental niche. In cases where a species appears in more than one niche, the  
 1420 grouping used in this study is highlighted in bold.

| <i>Modern Seasonal Succession</i> |                                                |                                        |                                  |
|-----------------------------------|------------------------------------------------|----------------------------------------|----------------------------------|
| <b>Epontic</b>                    | <b>Marginal Ice Zone (MIZ)</b>                 | <b>Both Epontic and MIZ</b>            | <b>Summer Bloom</b>              |
| <i>Navicula transitrans</i>       | <b><i>Bacterosira bathyomphala</i></b>         | <i>Actinocyclus curvatulus</i>         | <b><i>Coscinodiscus</i> spp.</b> |
| <i>Nitzschia frigida</i>          | <i>Chaetoceros furcellatus</i>                 | <b><i>Fossula arctica</i></b>          | <b><i>Leptocylindrus</i> sp.</b> |
|                                   | <i>Chaetoceros socialis</i>                    | <b><i>Fragilariopsis cylindrus</i></b> | <b><i>Rhizosolenia</i> spp.</b>  |
|                                   | <i>Leptocylindrus</i> sp.                      | <b><i>Fragilariopsis oceanica</i></b>  |                                  |
|                                   | <i>Odontella aurita</i>                        | <b><i>Navicula pelagica</i></b>        |                                  |
|                                   | <i>Paralia sulcata</i>                         | <b>Naviculoid pennates</b>             |                                  |
|                                   | <b><i>Porosira glacialis</i></b>               | <b><i>Nitzschia</i> spp.</b>           |                                  |
|                                   | <b><i>Staurosirella</i> cf. <i>pinnata</i></b> | <b><i>Pinnularia quadratarea</i></b>   |                                  |
|                                   | <i>Thalassionema nitzschioides</i>             | <b><i>Thalassiosira antarctica</i></b> |                                  |
|                                   | <b><i>Thalassiosira angulata</i></b>           | <b><i>Thalassiosira gravida</i></b>    |                                  |
|                                   | <b><i>Thalassiosira baltica</i></b>            |                                        |                                  |
|                                   | <b><i>Thalassiosira decipiens</i></b>          |                                        |                                  |
|                                   | <b><i>Thalassiosira hyalina</i></b>            |                                        |                                  |
|                                   | <b><i>Thalassiosira hyperborea</i></b>         |                                        |                                  |
|                                   | <b><i>Thalassiosira nordenskiöldii</i></b>     |                                        |                                  |
|                                   | <i>Thalassiosira pacifica</i>                  |                                        |                                  |

1421

1422 Continued on next page

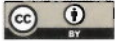

1423

Table 1 continued

| <i>Water Mass Tracers</i>      |                                    |                             | <i>Shelf to Basin Transport</i>    |                                 |                                         |
|--------------------------------|------------------------------------|-----------------------------|------------------------------------|---------------------------------|-----------------------------------------|
| Dicothermal                    | High Productivity                  | Alaska Stream               | Warmer Water                       | Neritic                         | Fresh Water                             |
| <i>Actinocyclus curvatulus</i> | <i>Chaetoceros</i> spp.            | <i>Neodenticula seminae</i> | <i>Azpeitia tabularis</i>          | <i>Actinoptychus senarius</i>   | <i>Lindavia</i> cf. <i>ocellata</i>     |
| <i>Thalassiosira trifulta</i>  | <i>Odontella aurita</i>            |                             | <i>Stellarimia stellaris</i>       | <i>Amphora</i> sp.              | <i>Lindavia stylorum</i>                |
|                                | <i>Thalassionema nitzschioides</i> |                             | <i>Thalassionema nitzschioides</i> | <i>Lindavia stylorum</i>        | <i>Staurosirella</i> cf. <i>pinnata</i> |
|                                | <i>Thalassiosira pacifica</i>      |                             | <i>Thalassiosira eccentrica</i>    | <i>Delphineis</i> spp.          | <i>Lindavia radiosa</i>                 |
|                                | <i>Thalassiosira</i> spp. small    |                             | <i>Thalassiosira oestrupii</i>     | <i>Dentonula confervacea</i>    |                                         |
|                                | <i>Thalassiothrix longissima</i>   |                             | <i>Thalassiosira symmetrica</i>    | <i>Diploneis smithii</i>        |                                         |
|                                |                                    |                             |                                    | Naviculoid pennates             |                                         |
|                                |                                    |                             |                                    | <i>Odontella aurita</i>         |                                         |
|                                |                                    |                             |                                    | <i>Paralia sulcata</i>          |                                         |
|                                |                                    |                             |                                    | <i>Rhaphoneis amphiceros</i>    |                                         |
|                                |                                    |                             |                                    | <i>Stephanopyxis turris</i>     |                                         |
|                                |                                    |                             |                                    | <i>Thalassiosira angulata</i>   |                                         |
|                                |                                    |                             |                                    | <i>Thalassiosira decipiens</i>  |                                         |
|                                |                                    |                             |                                    | <i>Thalassiosira eccentrica</i> |                                         |

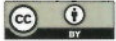

1424 Table 2: Distribution of Laminated Intervals during MIS 11. Note that the depth and age  
 1425 of laminated intervals encompasses all holes drilled, but the average duration is  
 1426 calculated using each of the holes that it is present in.

| Lamination    | Type | Depth (mbsf)  | Age (ka)    | Average Duration (kyrs) | Found in Holes |
|---------------|------|---------------|-------------|-------------------------|----------------|
| MIS 11.5      | II   | 112.02-111.47 | 367.2-366.0 | 0.50                    | C              |
| MIS 11.4      | II   | 113.14-112.94 | 369.7-369.3 | 0.34                    | CD             |
| MIS 11.3      | II   | 114.28-113.95 | 372.3-371.5 | 0.73                    | D              |
| MIS 11.2      | II   | 115.59-114.69 | 374.8-373.2 | 1.25                    | ACE            |
| MIS 11.1      | II   | 121.84-121.18 | 394.1-392.1 | 1.10                    | ED             |
| Termination V | I    | 130.00-126.52 | 423.3-410.4 | 12.14                   | ACDE           |

1437

Odd unit. Why "average"?  
 Median better perhaps?  
 And, how do Lamination  
 MIS 11.5 + 11.3 which  
 have only 1 hole representation  
 have different "avg durations"  
 than the noted age interval?



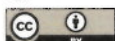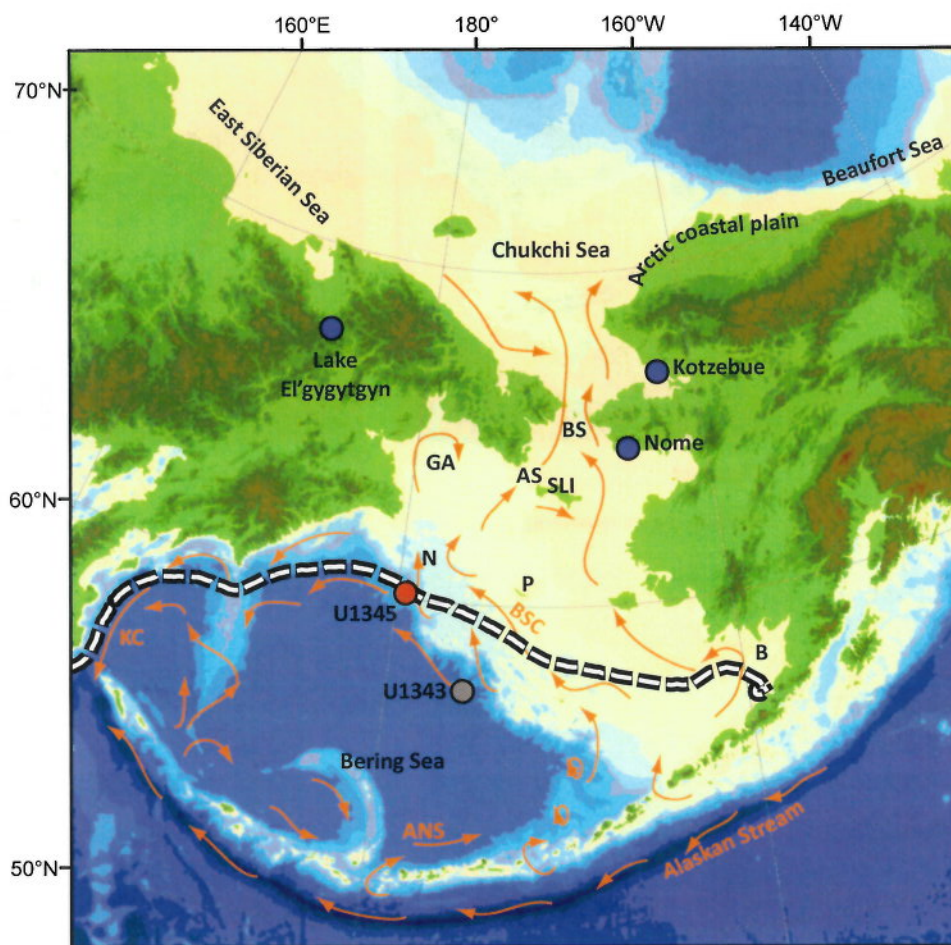

Figure 1. Map of Beringia. Locations of place names from the text are labeled: Aleutian North Slope Current (ANS), Anadyr Strait (AS), Bristol Bay (B), Bering Strait (BS), Bering Slope Current (BSC), Gulf of Anadyr (GA), Kamchatka Current (KC), Navarin Canyon (N), Pribilof Islands (P), St. Lawrence Island (SLI). The white and black dashed line is the modern, median maximum extent of sea ice (Cavaliere et al., 1996). Currents are in orange and are modified from Stabeno (Stabeno et al., 1999). Base map is modified from Manley (Manley, 2002).

mouthful!<sup>57</sup>  
maybe add time-range over w/this is "median-ed"

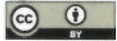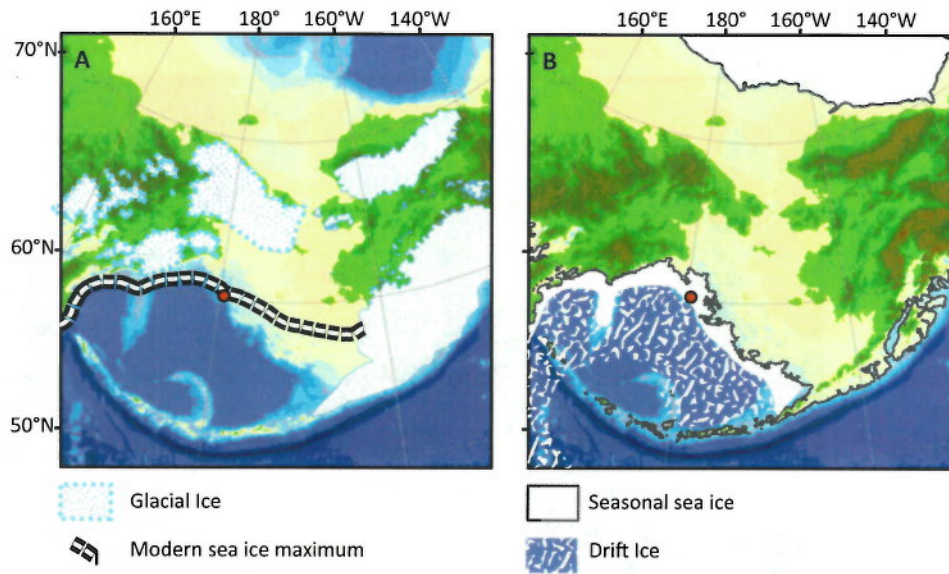

Figure 2. Maximum glacial and sea ice extents in Beringia. A. depicts the maximum glacial ice in Beringia as inferred from terminal and lateral moraines. This is not intended to show the maximum extent during a particular glaciation, but rather the maximum possible extent of glacial ice. These moraines are likely from several different major glaciations. The white and black dashed line is the modern, median maximum extent of sea ice (Cavaliere et al., 1996). B. depicts the approximate pattern of sea ice during glacial stages (Katsuki and Takahashi, 2005). The dark grey contour is -140 m, the approximate sea level during MIS 12 (Rohling et al., 2010). Base map is modified from Manley (Manley, 2002).

↳ Since using Manley's GIS layers, you should also import the certainty<sup>58</sup> polyline layer!

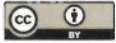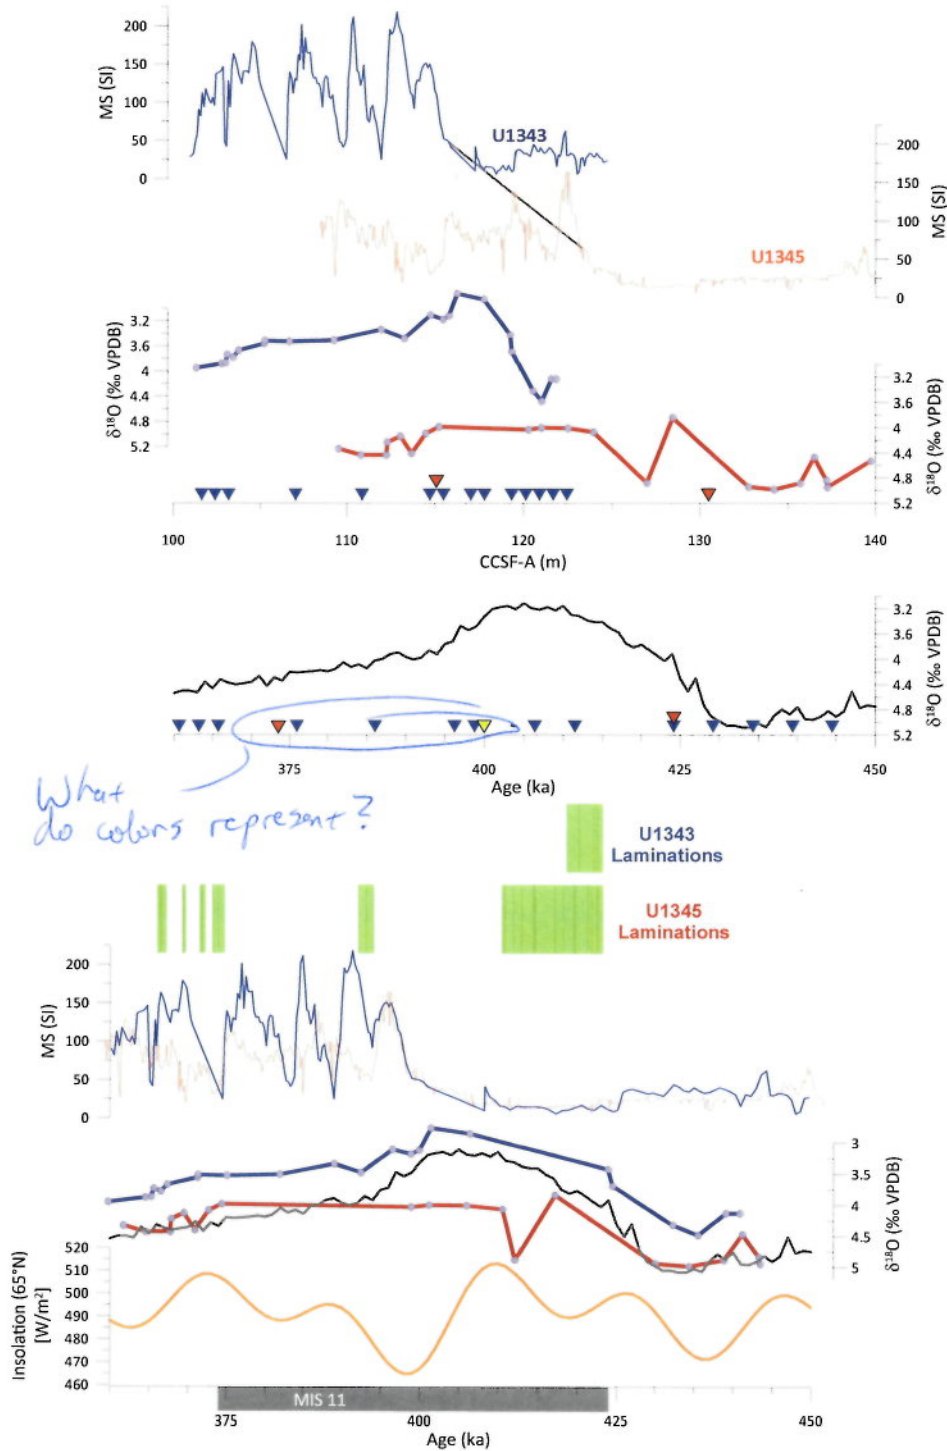

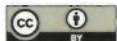

1438 Figure 3. Age model. Blue plots depict data from Site U1343, red plots are from U1345.  
1439 Magnetic susceptibility and benthic foraminiferal  $\delta^{18}\text{O}$  are plotted by depth for each Site  
1440 in the top half of the figure. The grey line joining the magnetic susceptibility plots  
1441 indicates the tie point that was added in this study. Inverted triangles indicate locations of  
1442 tie points between Bering Sea  $\delta^{18}\text{O}$  (Cook et al., In Press; Kim et al., 2014) and the global  
1443 marine stack (Lisiecki and Raymo, 2005), which is plotted in grey. Green bars indicate  
1444 laminated intervals in U1343 and U1345 plotted by age. The bottom half of the figure  
1445 depicts the same data (magnetic susceptibility and  $\delta^{18}\text{O}$ ) plotted by age with the global  
1446 marine stack (grey) and insolation at  $65^\circ\text{N}$  (orange for reference).  
1447  
1448

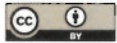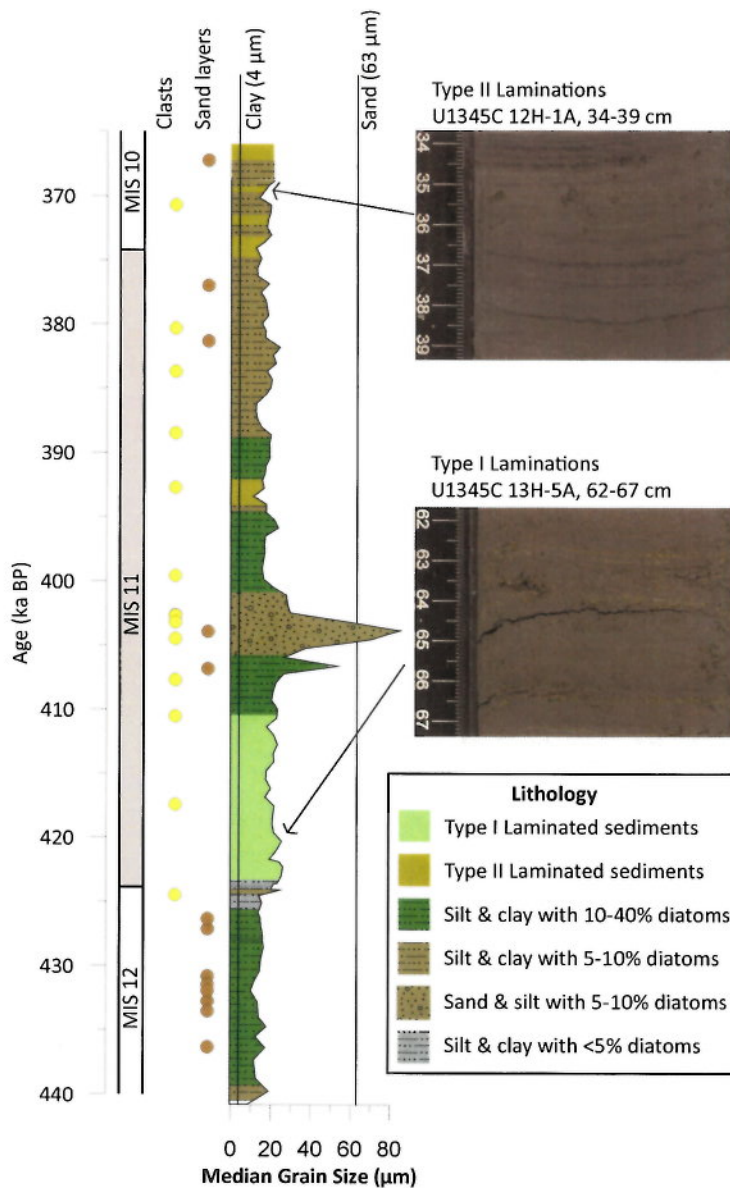

Figure 4. Lithostratigraphic column for U1345A. Marine Isotope Stage 11 is depicted as a grey bar. Ice rafted debris (yellow dots) and sand layers (maroon dots) are a compilation of these features in all four holes at U1345. The width of the lithologic column varies according to median grain size. Vertical lines indicate the cut off for clay and sand sized particles. Silt lies between the two lines. Colors depict varying amounts of diatoms relative to terrigenous grains in the sediment. Type I Laminations are depicted as pale green bars and Type II laminations are depicted as olive green bars. An example of each of the lamination types is shown in the images to the right.

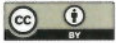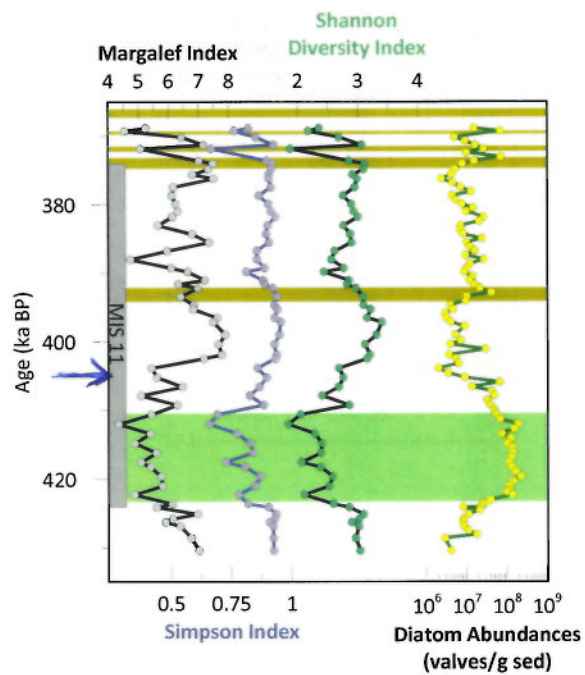

Figure 5. The Margalef, Simpson, and Shannon diversity indices plotted with diatom abundances. Type I Laminations are depicted as pale green bars and Type II laminations are depicted as olive green bars.

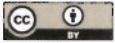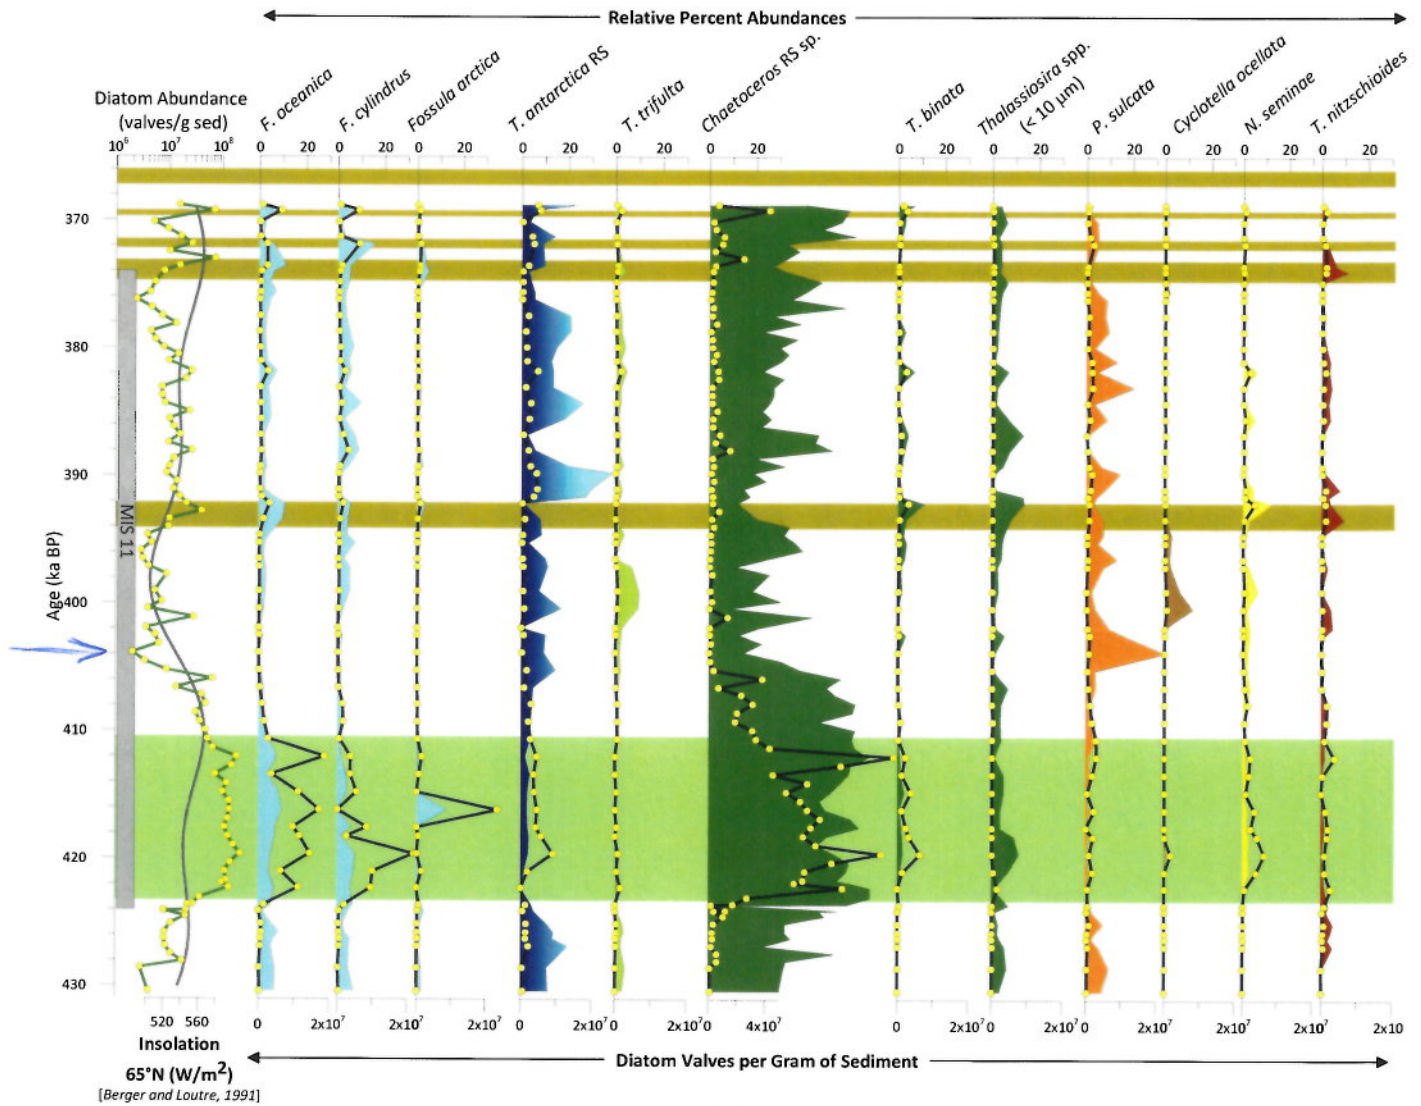

Fig 6

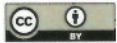

1449 Figure 6. Absolute and relative percent abundances of all diatoms that occur in  
1450 abundances greater than 10% of any assemblage. Line plots depict absolute abundance  
1451 and area plots depict relative percent abundance. Species are color coded according to the  
1452 niche that they are grouped into: marginal ice zone (light blue), both ice types (dark blue  
1453 to light blue), dicothermal (light green), high productivity (green), neritic (orange),  
1454 freshwater (brown), North Pacific (yellow), and warm water (red). Insolation 65° N (light  
1455 grey line) is also shown. Type I Laminations are depicted as pale green bars and Type II  
1456 laminations are depicted as olive green bars.



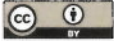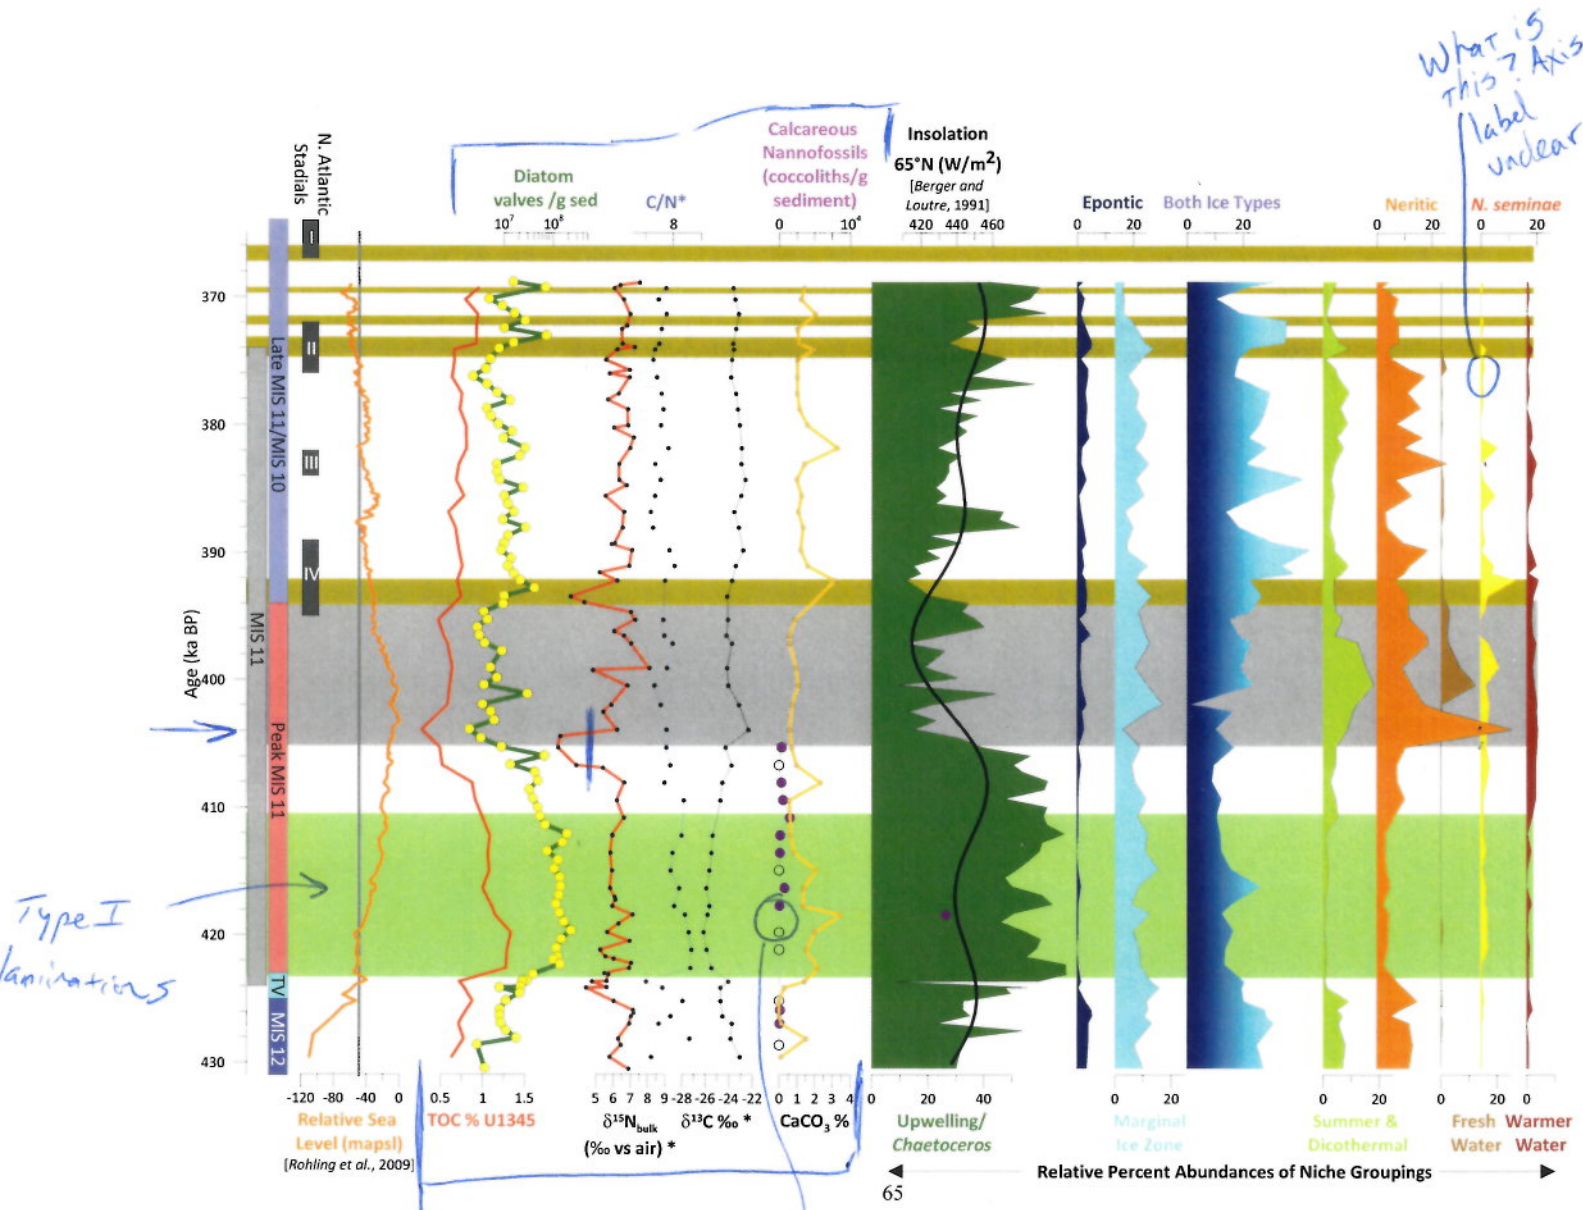

Hard to tell which axis refers to what line; perhaps color code axis + text to same color as line + points? Plus some values outside of axes + try offsetting axes to help w/ space

filled vs open circles?

Fig. 7

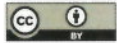

1457 Figure 7. Summary of geochemistry and biological proxies. The grey vertical bar depicts  
1458 the duration of MIS 11, colored vertical bars refer to the sections in the text, and dark  
1459 grey bars show the timing of North Atlantic stadials (I-IV) (Voelker et al., 2010). Global  
1460 eustatic sea level (orange) is plotted for reference. The sill depth of Bering Straight (-50  
1461 m amsl) is shown as a vertical grey line. Total organic carbon (red) is plotted with the  
1462 total diatom abundance (green line, yellow dots). Geochemical data is plotted as  $\delta^{15}\text{N}$   
1463 (red), C/N (blue),  $\delta^{13}\text{C}$  (black), and %  $\text{CaCO}_3$  (yellow). Biological proxies include  
1464 absolute abundance of calcareous nannofossils (purple), and relative percent abundances  
1465 of diatoms grouped by environmental niche (see color coding in Fig. 6). Insolation at 65°  
1466 N (black) is overlain on *Chaetoceros* RS relative percent abundances. Type I  
1467 Laminations are depicted as pale green bars and Type II laminations are depicted as olive  
1468 green bars. A grey bar indicates the Beringian glacial advance.

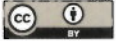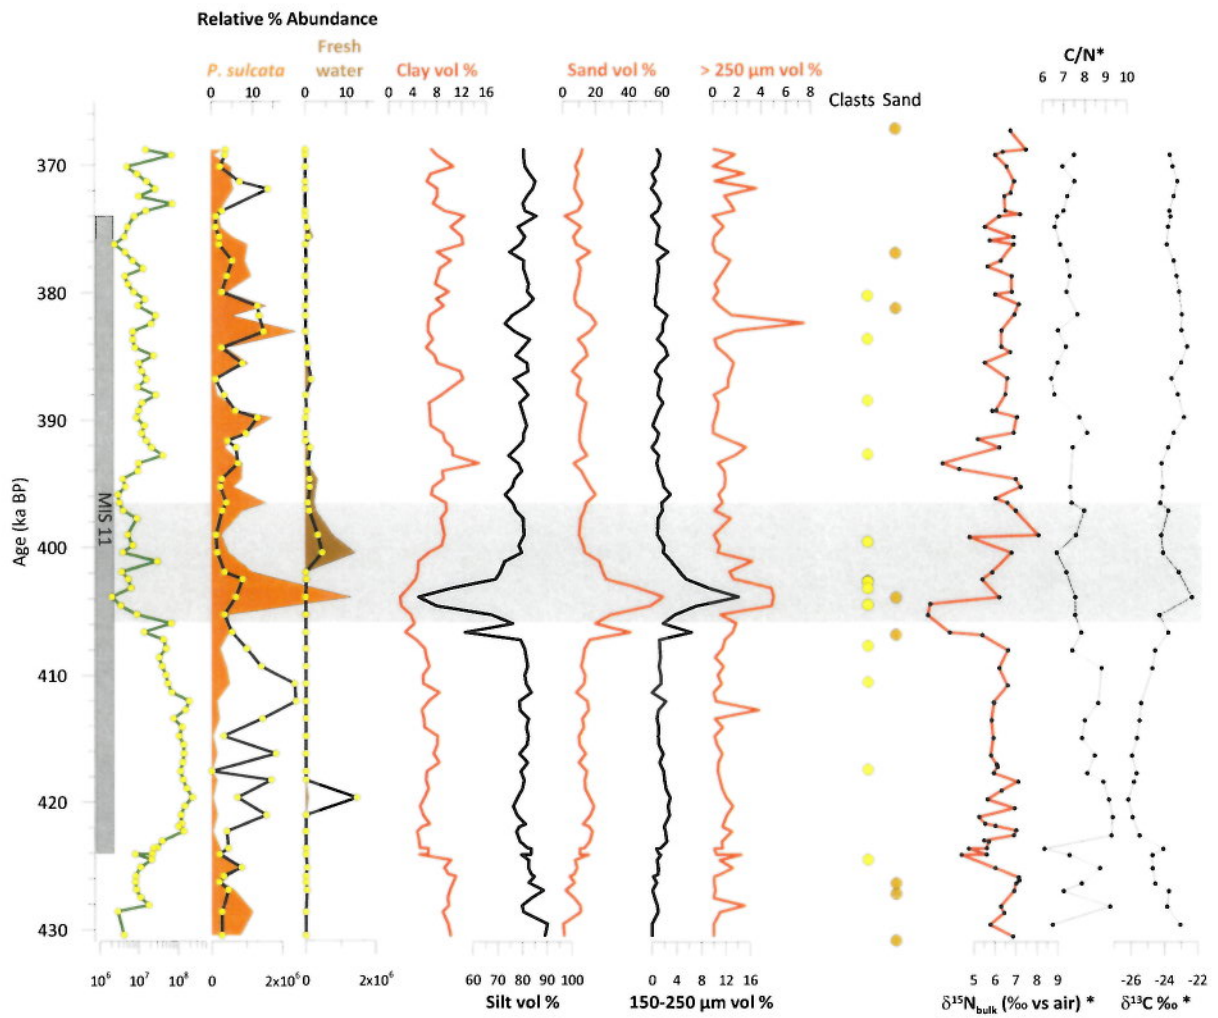

Fig. 8

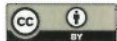

1469 Figure 8. Proxy indicators of shelf to basin transport. Total diatom absolute abundances  
1470 are plotted next to absolute (line plots) and relative percent abundance of *P. sulcata*  
1471 (orange area plot) and fresh water species (brown area plot). High-resolution grain size  
1472 includes % clay, sand, and greater than 250  $\mu\text{m}$  (red lines) and % silt and 150-250  $\mu\text{m}$   
1473 (black lines). Yellow circles indicate isolated clasts (IRD), maroon circles indicate sand  
1474 layers for all holes at U1345. Geochemical data is plotted as  $\delta^{15}\text{N}$  (red), C/N (black), and  
1475  $\delta^{13}\text{C}$  (black). The grey bar spans 406-396 ka, the interval of increased shelf to basin  
1476 transport in Beringia.

1477
